# Supplementary material for: Antibiofilm and cytotoxic metabolites from the entomopathogenic fungus Samsoniella aurantia
Source: publisher site journal article supplement (doi:10.3762/bjoc.21.23), 2025-02-11
Supplement: Additional file 1 [file 1860-5397-21-23-S1.pdf]

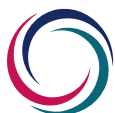

## Supporting Information

for

### **Antibiofilm and cytotoxic metabolites from the entomopathogenic fungus *Samsoniella aurantia***

Rita Toshe, Syeda J. Khalid, Blondelle Matio Kemkuignou, Esteban Charria-Girón, Paul Eckhardt, Birthe Sandargo, Kunlapat Nuchthien, J. Jennifer Luangsa-ard, Till Opatz, Hedda Schrey, Sherif S. Ebada and Marc Stadler

*Beilstein J. Org. Chem.* **2025**, *21*, 327–339. [doi:10.3762/bjoc.21.23](https://doi.org/10.3762/bjoc.21.23)

### **HRESIMS profiles and NMR spectroscopic data of compounds 1–6**

## Contents of Supporting Information

| #  | Contents                                                                                                                                                                                                                                                                                                                                                         | Page |
|----|------------------------------------------------------------------------------------------------------------------------------------------------------------------------------------------------------------------------------------------------------------------------------------------------------------------------------------------------------------------|------|
| 1  | Biofilm inhibition assay                                                                                                                                                                                                                                                                                                                                         | S2   |
| 2  | Figure S1. A. Effect of farinosone D ( <b>1</b> ) on growth of <i>S. aureus</i> at varying concentrations in CASO medium. B. Effect of farinosone A ( <b>2</b> ) on growth of <i>S. aureus</i> at varying concentrations in CASO medium. C. Effect of farinosones D ( <b>1</b> ) and A ( <b>2</b> ) relative percent adhesion of <i>S. aureus</i> to fibrinogen. | S3   |
| 3  | Figure S2. A. Effect of farinosone D ( <b>1</b> ) on growth of <i>S. aureus</i> at varying concentrations in Müller Hinton Broth (MHB) medium. B. Effect of farinosone A ( <b>2</b> ) on growth of <i>S. aureus</i> at varying concentrations in Müller Hinton Broth (MHB) medium.                                                                               | S3   |
| 4  | Figure S3. LRESIMS spectrum of <b>1</b> .                                                                                                                                                                                                                                                                                                                        | S4   |
| 5  | Figure S4. HRESIMS spectrum of <b>1</b> .                                                                                                                                                                                                                                                                                                                        | S5   |
| 6  | Figure S5. <sup>1</sup> H NMR spectrum of <b>1</b> in DMSO- <i>d</i> <sub>6</sub> at 500 MHz.                                                                                                                                                                                                                                                                    | S6   |
| 7  | Figure S6. <sup>13</sup> C NMR spectrum of <b>1</b> in DMSO- <i>d</i> <sub>6</sub> at 125 MHz.                                                                                                                                                                                                                                                                   | S7   |
| 8  | Figure S7. <sup>1</sup> H- <sup>1</sup> H COSY spectrum of <b>1</b> in DMSO- <i>d</i> <sub>6</sub> at 500 MHz.                                                                                                                                                                                                                                                   | S8   |
| 9  | Figure S8. HMBC spectrum of <b>1</b> in DMSO- <i>d</i> <sub>6</sub> at 500 MHz.                                                                                                                                                                                                                                                                                  | S9   |
| 10 | Figure S9. HSQC spectrum of <b>1</b> in DMSO- <i>d</i> <sub>6</sub> at 500 MHz.                                                                                                                                                                                                                                                                                  | S10  |
| 11 | Figure S10. ROESY spectrum of <b>1</b> in DMSO- <i>d</i> <sub>6</sub> at 500 MHz.                                                                                                                                                                                                                                                                                | S11  |
| 12 | Figure S11. Comparison of experimental (black) and simulated Boltzmann-averaged ECD spectra for compound <b>1</b> .                                                                                                                                                                                                                                              | S12  |
| 13 | Table S1. Similarity factor for each calculated stereoisomer of compound <b>1</b> .                                                                                                                                                                                                                                                                              | S12  |
| 14 | Figure S12. HRESIMS spectrum of <b>2</b> .                                                                                                                                                                                                                                                                                                                       | S13  |
| 15 | Figure S13. <sup>1</sup> H NMR spectrum of <b>2</b> in acetone- <i>d</i> <sub>6</sub> at 500 MHz.                                                                                                                                                                                                                                                                | S14  |
| 16 | Figure S14. DEPTQ spectrum of <b>2</b> in acetone- <i>d</i> <sub>6</sub> at 125 MHz.                                                                                                                                                                                                                                                                             | S15  |
| 17 | Figure S15. <sup>1</sup> H- <sup>1</sup> H COSY spectrum of <b>2</b> in acetone- <i>d</i> <sub>6</sub> at 500 MHz.                                                                                                                                                                                                                                               | S16  |
| 18 | Figure S16. HMBC spectrum of <b>2</b> in acetone- <i>d</i> <sub>6</sub> at 500 MHz.                                                                                                                                                                                                                                                                              | S17  |
| 19 | Figure S17. HSQC spectrum of <b>2</b> in acetone- <i>d</i> <sub>6</sub> at 500 MHz.                                                                                                                                                                                                                                                                              | S18  |
| 20 | Figure S18. HRESIMS spectrum of <b>3</b> .                                                                                                                                                                                                                                                                                                                       | S19  |
| 21 | Figure S19. <sup>1</sup> H NMR spectrum of <b>3</b> in acetone- <i>d</i> <sub>6</sub> at 500 MHz.                                                                                                                                                                                                                                                                | S20  |
| 22 | Figure S20. <sup>1</sup> H- <sup>1</sup> H COSY spectrum of <b>3</b> in acetone- <i>d</i> <sub>6</sub> at 500 MHz.                                                                                                                                                                                                                                               | S21  |
| 23 | Figure S21. HMBC spectrum of <b>3</b> in acetone- <i>d</i> <sub>6</sub> at 500 MHz.                                                                                                                                                                                                                                                                              | S22  |
| 24 | Figure S22. HSQC spectrum of <b>3</b> in acetone- <i>d</i> <sub>6</sub> at 500 MHz.                                                                                                                                                                                                                                                                              | S23  |
| 25 | Figure S23. HRESIMS spectrum of <b>4</b> .                                                                                                                                                                                                                                                                                                                       | S24  |
| 26 | Figure S24. <sup>1</sup> H NMR spectrum of <b>4</b> in DMSO- <i>d</i> <sub>6</sub> at 500 MHz.                                                                                                                                                                                                                                                                   | S25  |
| 27 | Figure S25. <sup>1</sup> H- <sup>1</sup> H COSY spectrum of <b>4</b> in DMSO- <i>d</i> <sub>6</sub> at 500 MHz.                                                                                                                                                                                                                                                  | S26  |
| 28 | Figure S26. HMBC spectrum of <b>4</b> in DMSO- <i>d</i> <sub>6</sub> at 500 MHz.                                                                                                                                                                                                                                                                                 | S27  |
| 29 | Figure S27. HSQC spectrum of <b>4</b> in DMSO- <i>d</i> <sub>6</sub> at 500 MHz.                                                                                                                                                                                                                                                                                 | S28  |
| 30 | Figure S28. HRESIMS spectrum of <b>5</b> .                                                                                                                                                                                                                                                                                                                       | S29  |
| 31 | Figure S29. <sup>1</sup> H NMR spectrum of <b>5</b> in DMSO- <i>d</i> <sub>6</sub> at 500 MHz.                                                                                                                                                                                                                                                                   | S30  |
| 32 | Figure S30. <sup>1</sup> H- <sup>1</sup> H COSY spectrum of <b>5</b> in DMSO- <i>d</i> <sub>6</sub> at 500 MHz.                                                                                                                                                                                                                                                  | S31  |
| 33 | Figure S31. HMBC spectrum of <b>5</b> in DMSO- <i>d</i> <sub>6</sub> at 500 MHz.                                                                                                                                                                                                                                                                                 | S32  |
| 34 | Figure S32. HSQC spectrum of <b>5</b> in DMSO- <i>d</i> <sub>6</sub> at 500 MHz.                                                                                                                                                                                                                                                                                 | S33  |
| 35 | Figure S33. HRESIMS spectrum of <b>6</b> .                                                                                                                                                                                                                                                                                                                       | S34  |
| 36 | Figure S34. <sup>1</sup> H NMR spectrum of <b>6</b> in DMSO- <i>d</i> <sub>6</sub> at 500 MHz.                                                                                                                                                                                                                                                                   | S35  |

## Biofilm inhibition assay

Biofilm inhibition assays were conducted according to the methodology previously described (Soliga et al., 2021), targeting the inhibition of biofilm formation in *Staphylococcus aureus* (DSM 1104). *S. aureus* were cultured in CASO medium at 37 °C for 18 h, respectively, in a shaker at 120 rpm after being thawed from a –20 °C stock solution. The culture's optical density at 600 nm (OD<sub>600</sub>) was measured and adjusted to a 0.001 McFarland standard in CASO medium with 4% glucose for *S. aureus*, respectively. Microtiter plates were loaded with 150 µL of the bacterial suspension containing serially diluted test compounds (125–0.9 µg/mL) and incubated for 24 h at 37 °C. The evaluation of biofilm inhibition was performed by staining the biofilm with 0.1% crystal violet (CV). After staining, the plates were washed, and the biofilm dissolved in 95% ethanol. The absorbance of the dissolved biofilm was measured at 530 nm using a plate reader. The negative control was methanol (2.5%) while microporenic acid A at a concentration range of 7.8 to 125 µg/mL was used as the positive control for *S. aureus* (Chepkirui et al., 2018). All experiments were performed twice, and the standard deviation (SD) was maintained at or below 15% for *S. aureus*.

Differences between samples and the control group were determined by a two-tailed Student's *t*-test. Statistical significance was defined as  $p < 0.05$ . Analysis was carried out using GraphPad Prism 9<sup>®</sup> (GraphPad Software, San Diego, CA, USA).

## References

- Chepkirui, C.; Yuyama, K.T.; Wanga, L.A.; Decock, C.; Matasyoh, J.C.; Abraham, W.R.; Stadler, M. Microporenic acids A-G, biofilm inhibitors, and antimicrobial agents from the Basidiomycete *Microporus* Species. *J. Nat. Prod.* **2018**, *81*, 778-784.
- Soliga, K.J.; Bär, S.I.; Oberhuber, N.; Zeng, H.; Schrey, H.; Schobert, R. Synthesis and bioactivity of ancorinoside B, A marine diglycosyl tetramic acid. *Mar. Drugs.* **2021**, *19*, 583.

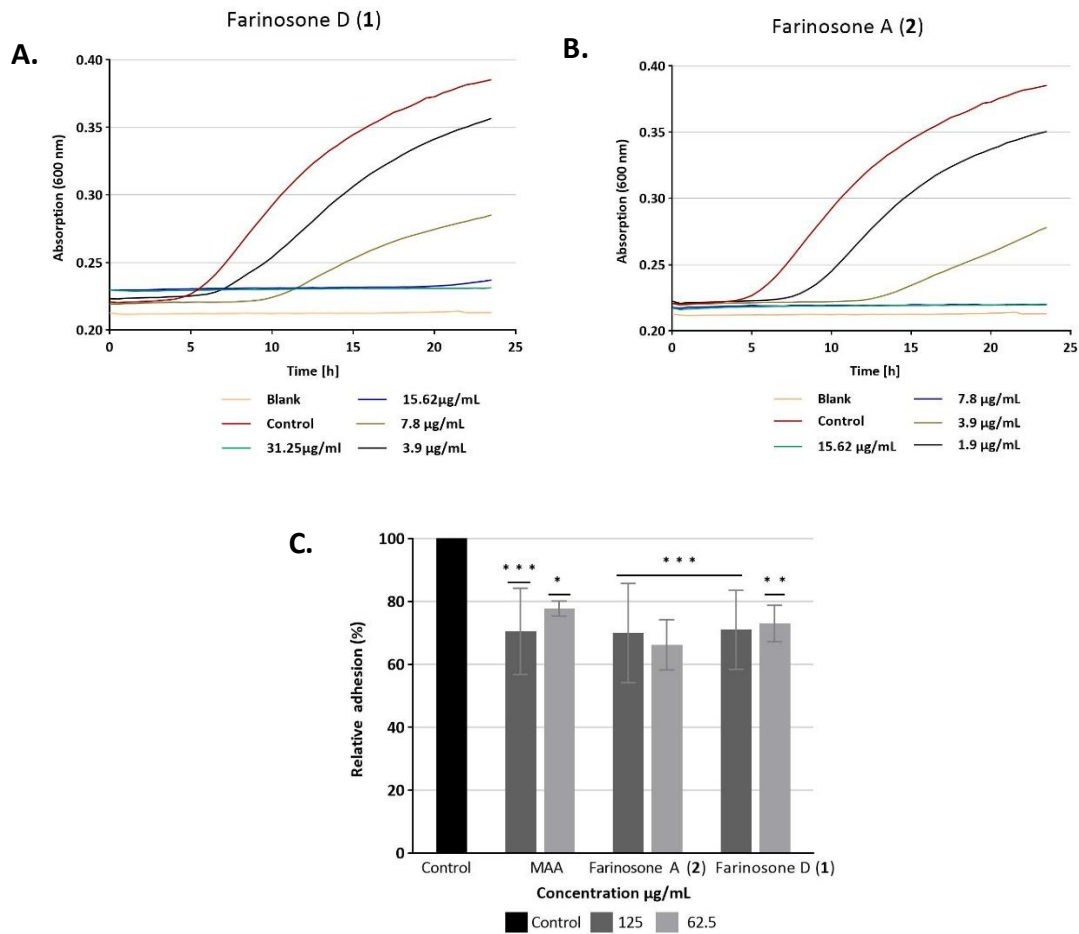

Figure S1. A. Effect of farinosone D (1) on growth of *S. aureus* at varying concentrations in CASO medium. B. Effect of farinosone A (2) on growth of *S. aureus* at varying concentrations in CASO medium. C. Effect of farinosones D (1) and A (2) relative percent adhesion of *S. aureus* to fibrinogen. Microporenic acid A (MAA) was used as positive control. Methanol was used as a solvent control and taken as 100%. Error bars indicate standard deviation of duplicates in two biological repeats; p values: \* p < 0.05, \*\* p < 0.01, \*\*\* p < 0.001.

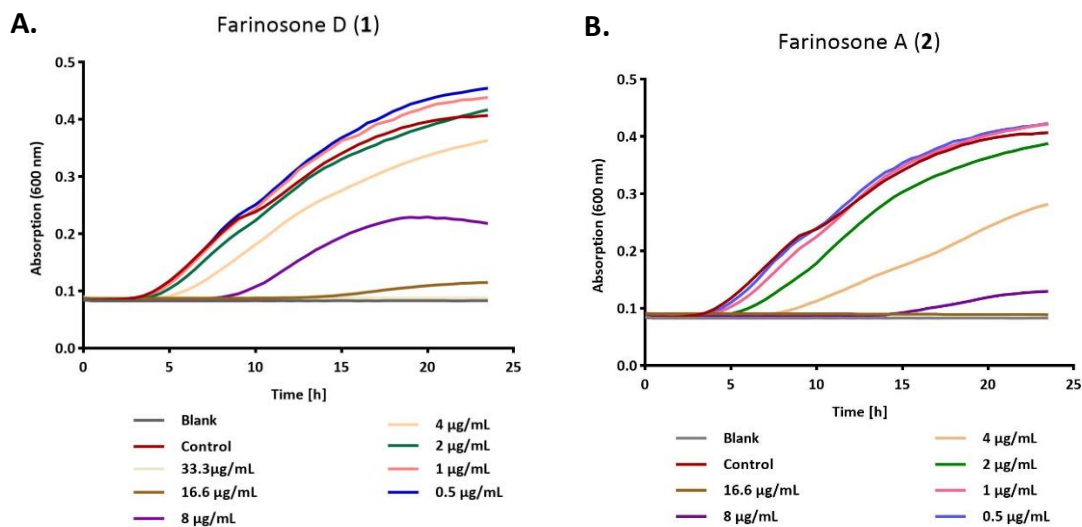

Figure S2. A. Effect of farinosone D (1) on growth of *S. aureus* at varying concentrations in Müller Hinton Broth (MHB) medium. B. Effect of farinosone A (2) on growth of *S. aureus* at varying concentrations in Müller Hinton Broth (MHB) medium.

# Generic Display Report

## Analysis Info

Analysis Name S:\DATA\AmaZon\lto20\_Rita Toshe\23\_06\MY07955-Rice-S1-F4-F03\_BC5\_01\_14453.d  
Method 14453.m  
Sample Name MY07955-Rice-S1-F4-F03  
Comment

Acquisition Date 18.06.2023 05:31:05  
Operator lab  
Instrument amaZon speed

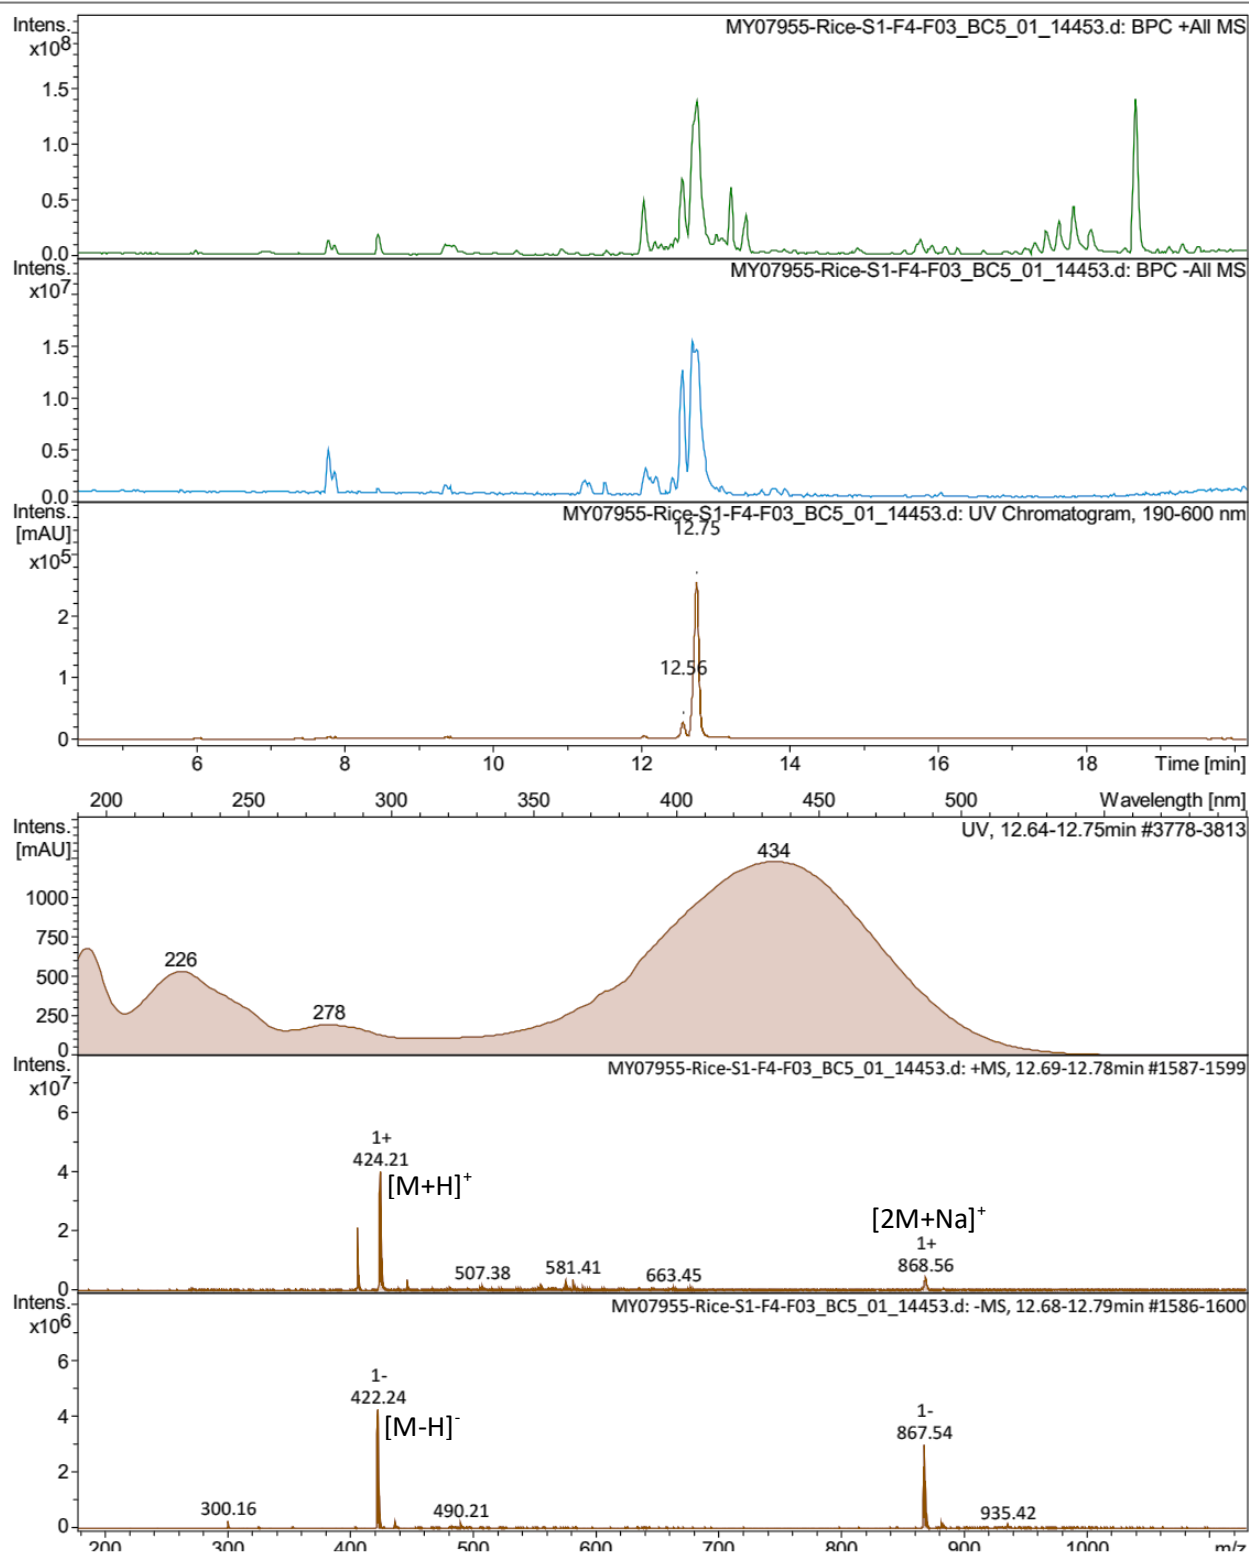

Figure S3. LRESIMS spectrum of 1.

# Generic Display Report

## Analysis Info

Analysis Name S:\DATA\MaXis\lto20\_Rita Toshe\23\_06\MY07955-Rice-S1-F04-R2-F03\_43\_01\_12047.d  
Method pos\_säure\_10000\_screening\_ms\_100\_2500\_line.m  
Sample Name MY07955-Rice-S1-F04-R2-F03  
Comment Screening01  
Waters Acquity UPLC BEH C\_18 1,7um 2.1x50mm

Acquisition Date 28.06.2023 11:55:58  
Operator ate06  
Instrument maXis

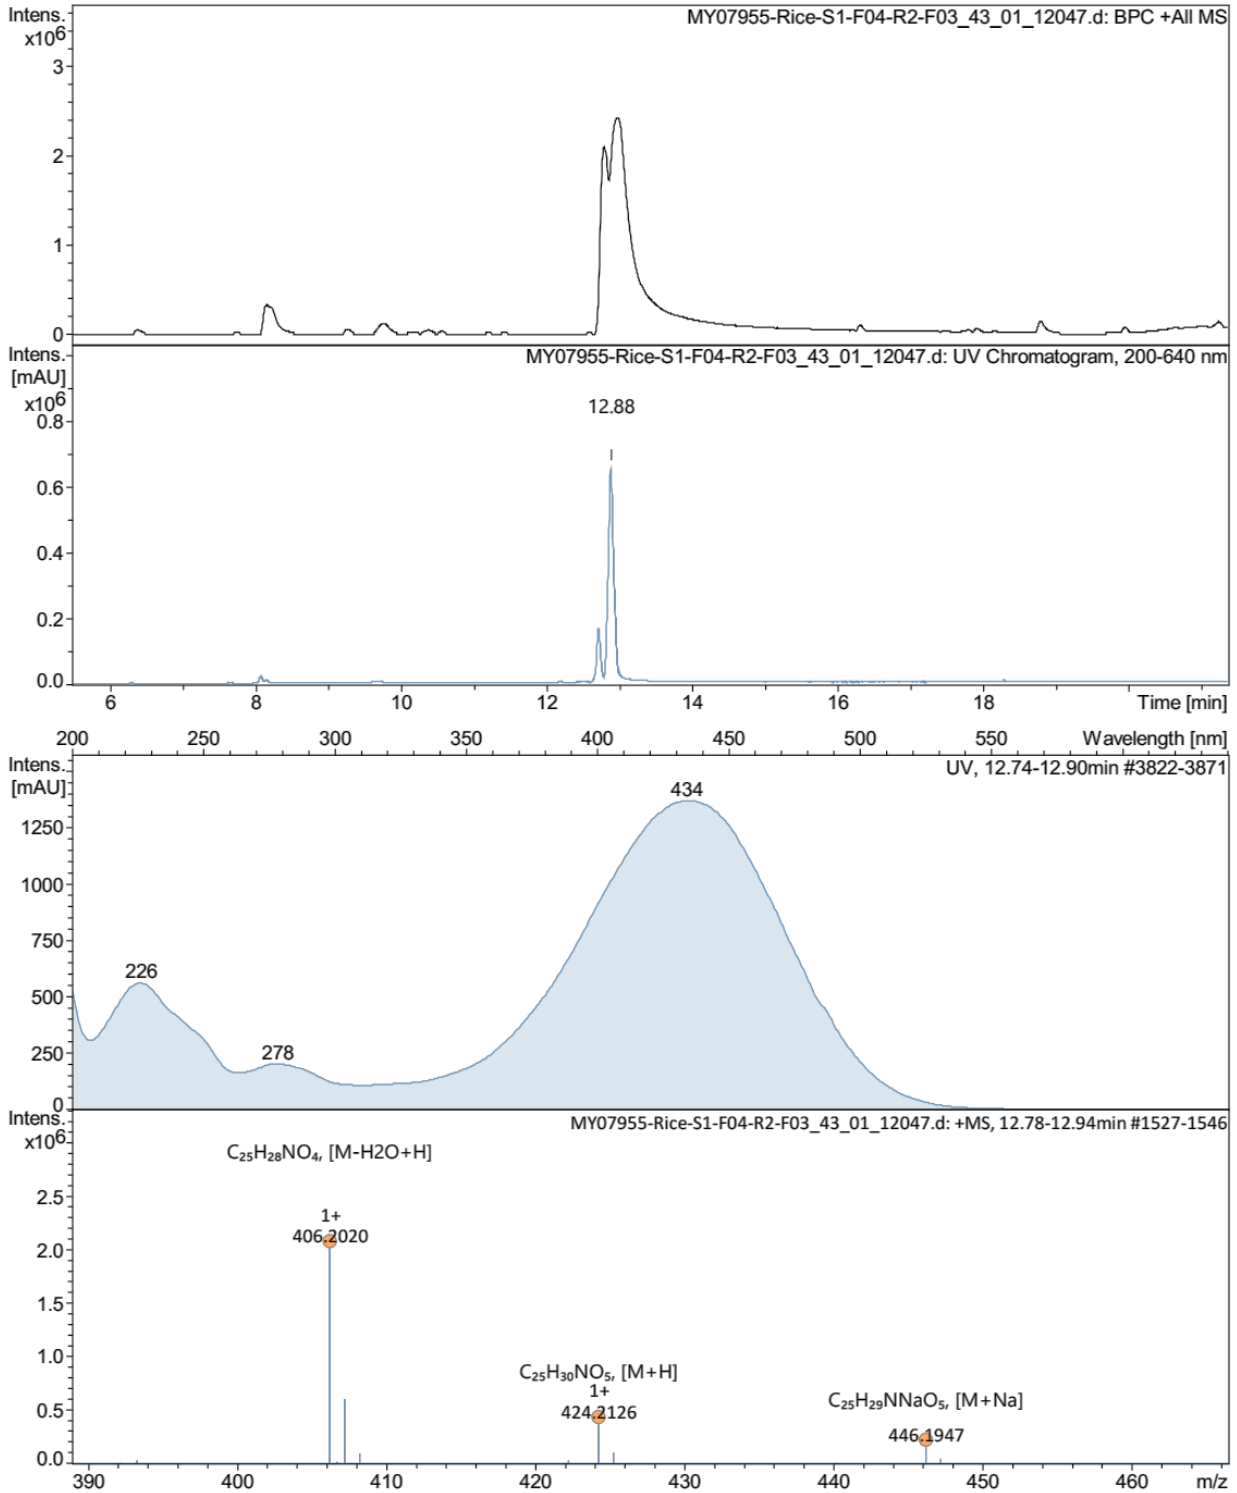

Figure S4. HRESIMS spectrum of **1**.

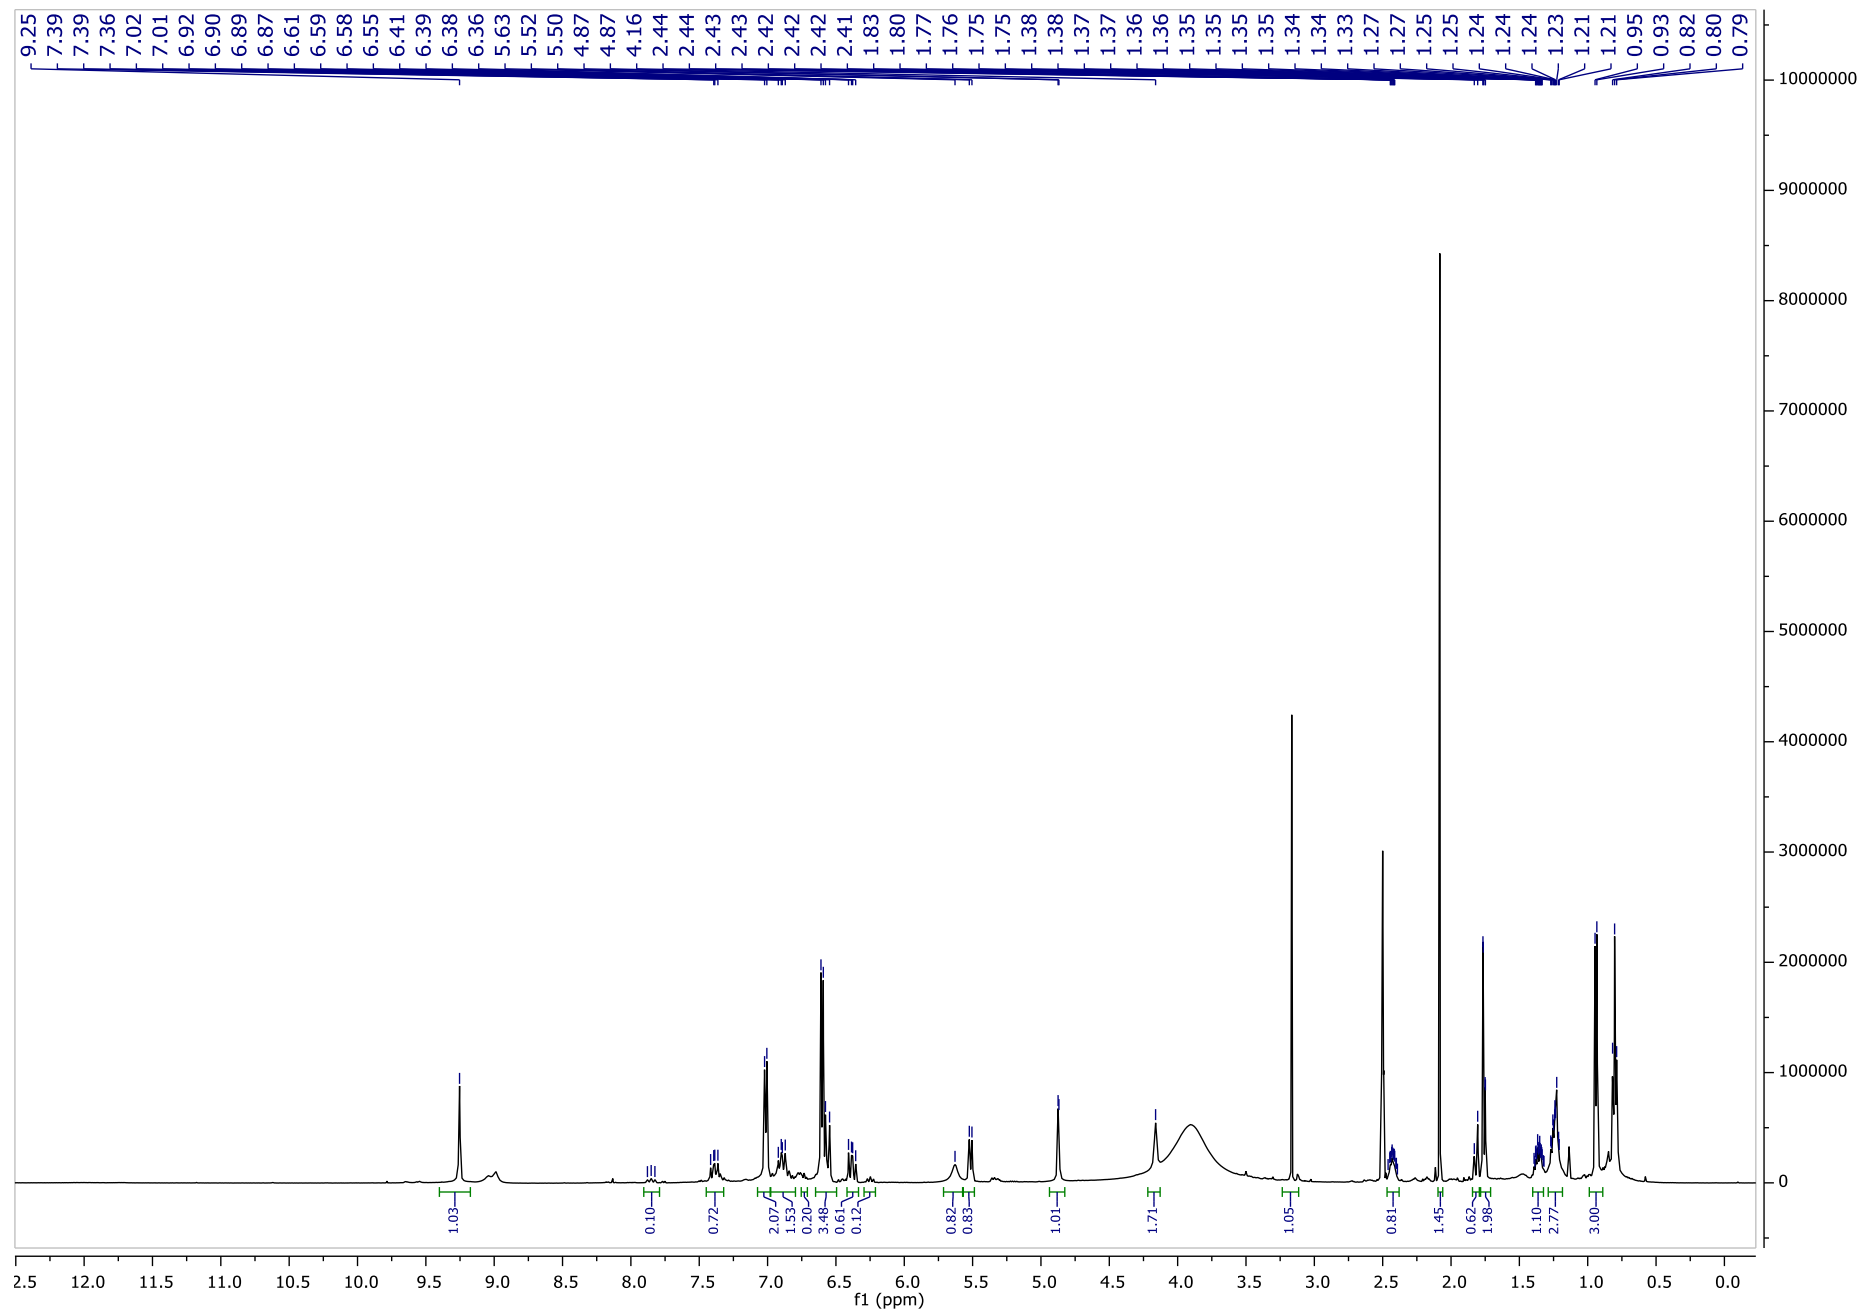

Figure S5.  $^1\text{H}$  NMR spectrum of **1** in  $\text{DMSO}-d_6$  at 500 MHz.

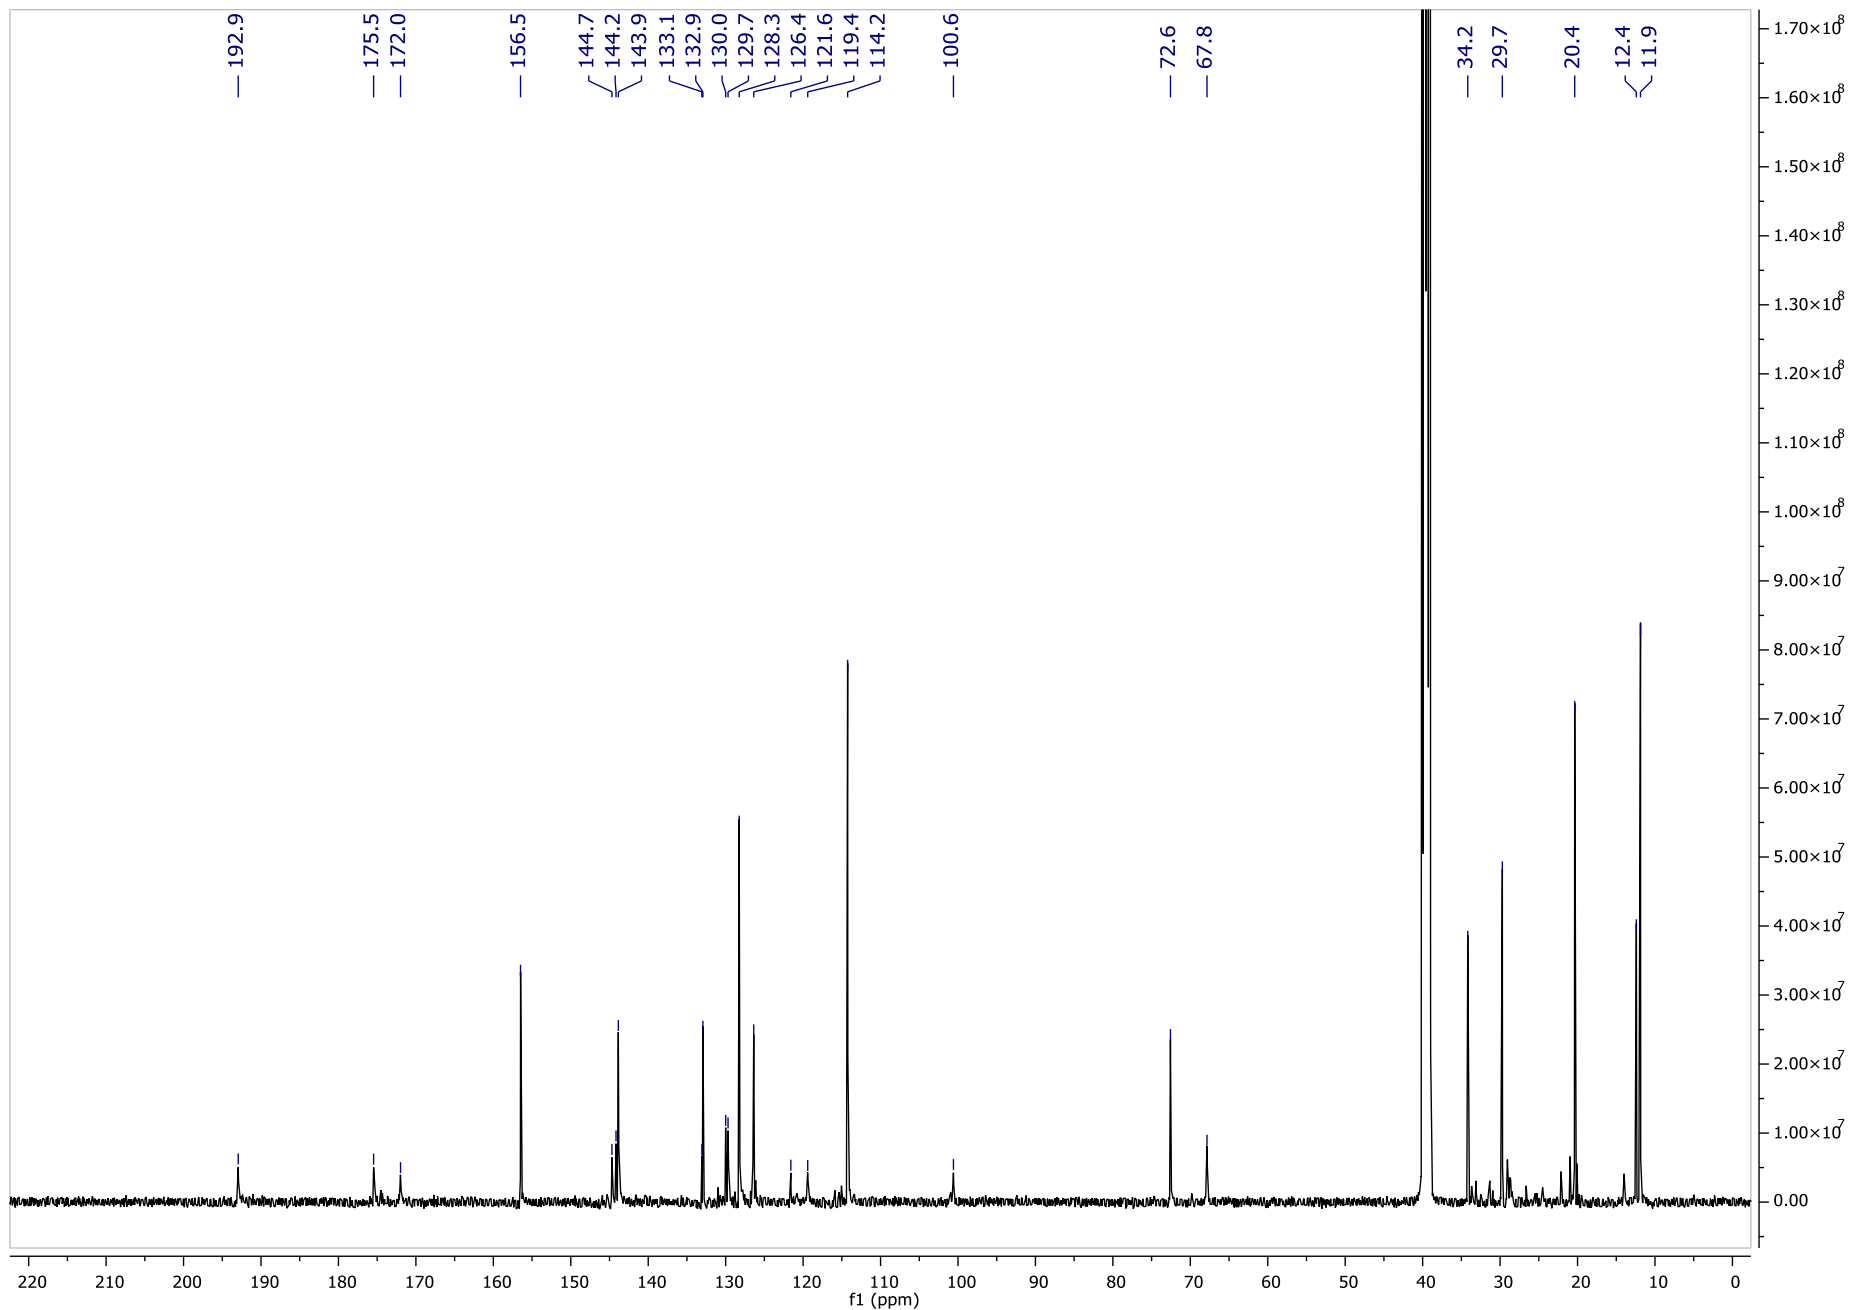

Figure S6.  $^{13}\text{C}$  NMR spectrum of **1** in  $\text{DMSO-}d_6$  at 125 MHz.



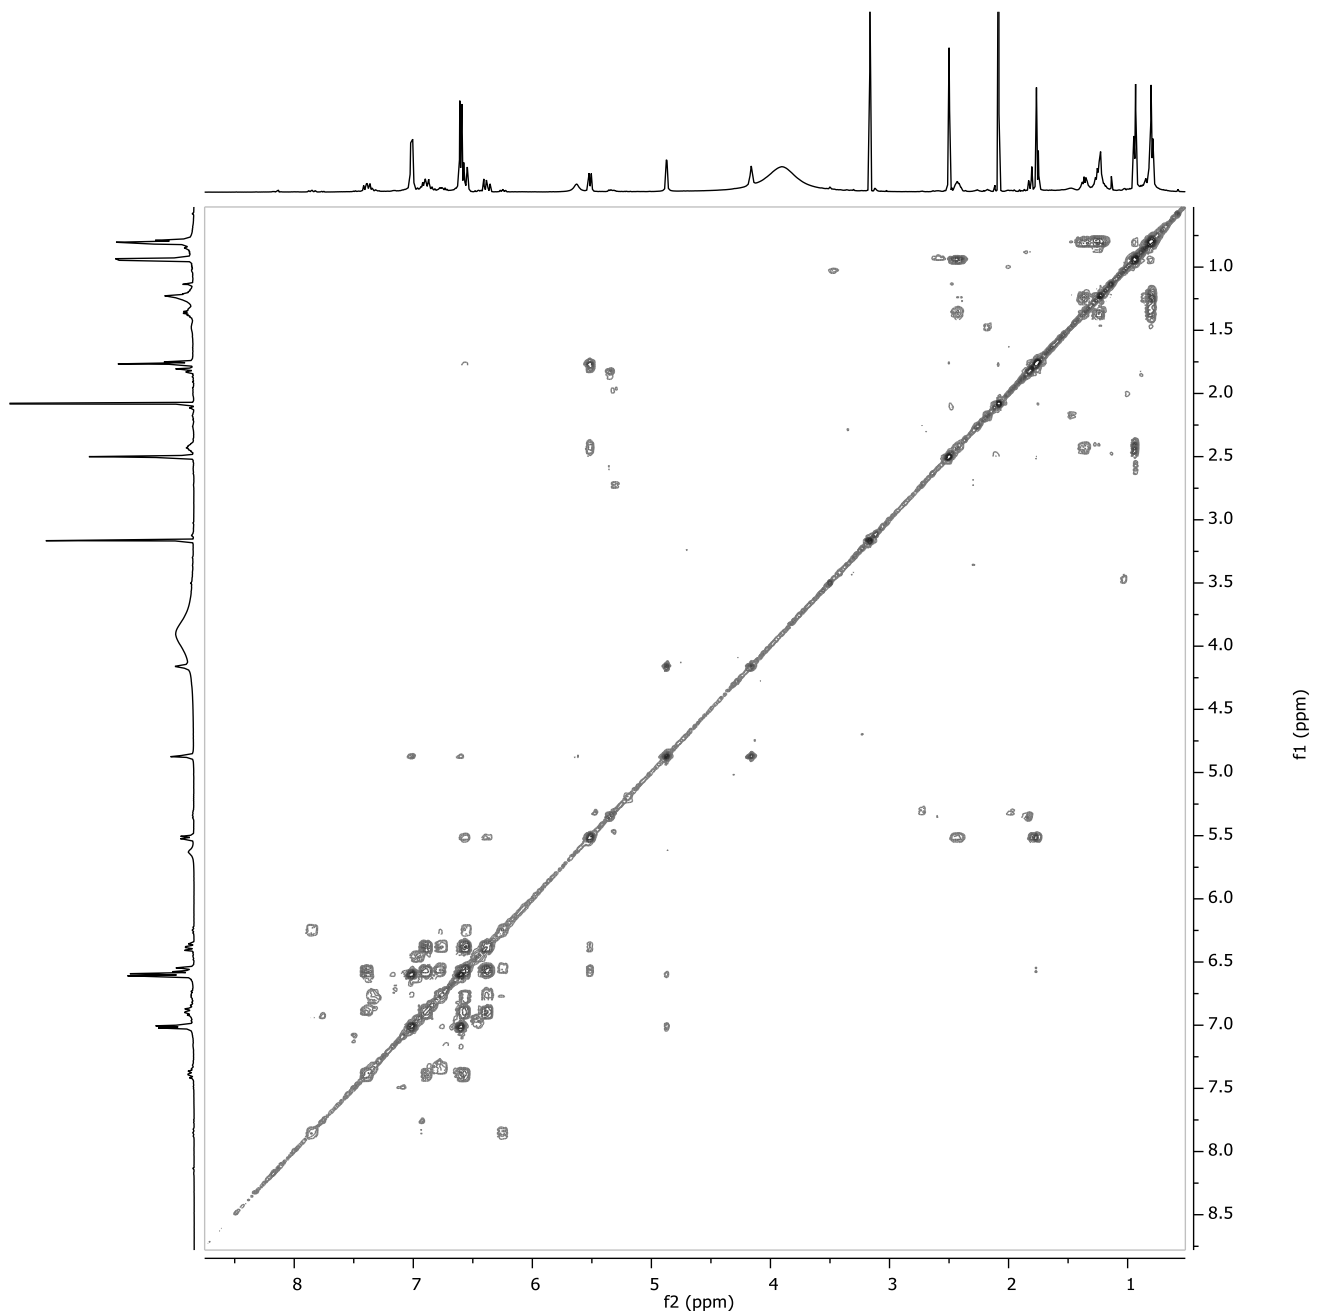

Figure S7.  $^1\text{H}$ - $^1\text{H}$  COSY spectrum of **1** in  $\text{DMSO}-d_6$  at 500 MHz.

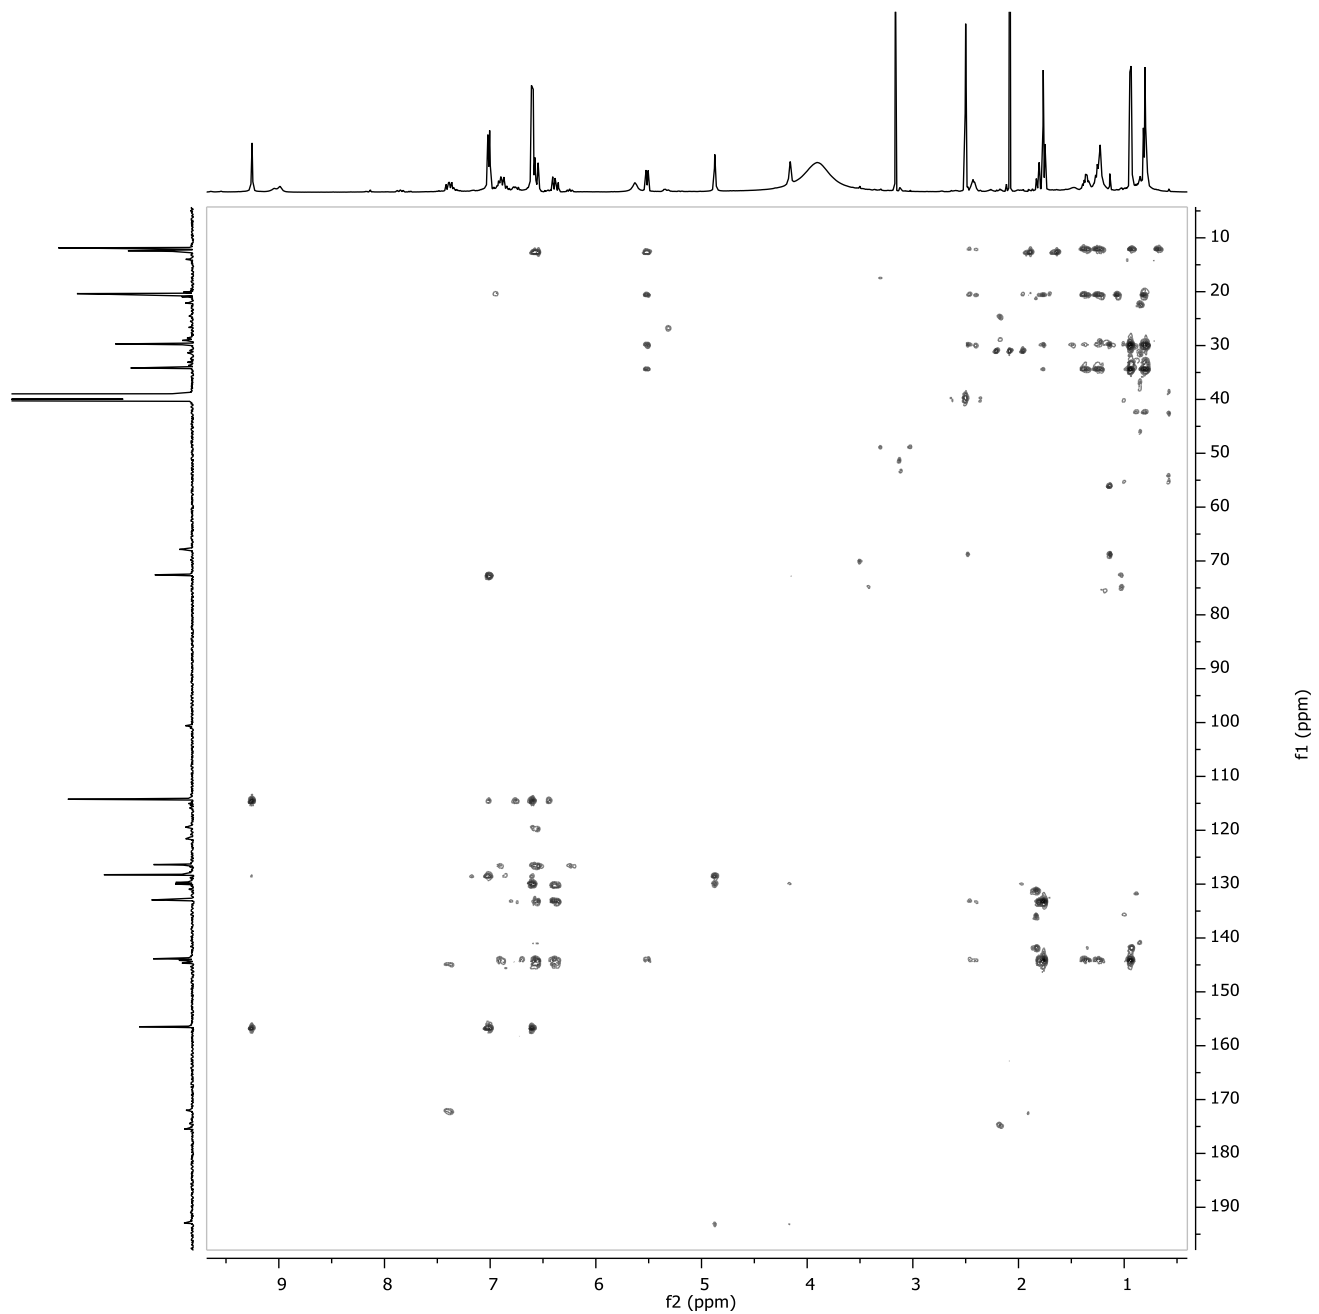

Figure S8. HMBC spectrum of **1** in DMSO- $d_6$  at 500 MHz.

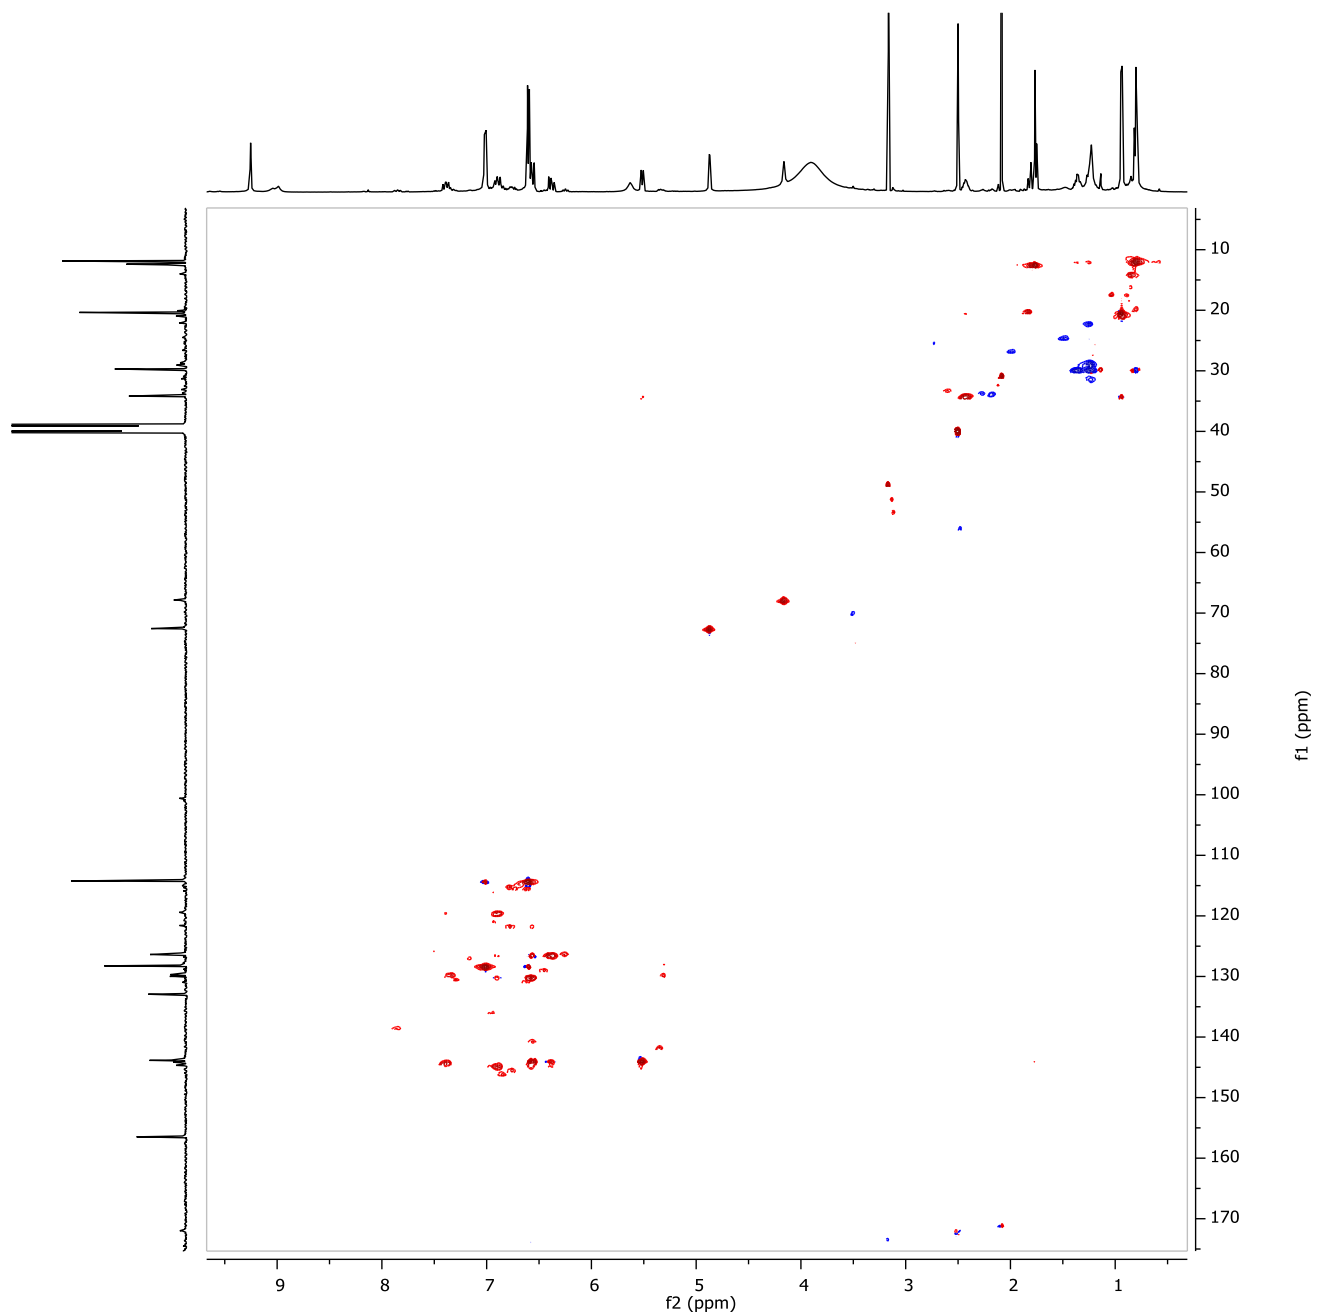

Figure S9. HSQC spectrum of **1** in DMSO- $d_6$  at 500 MHz.

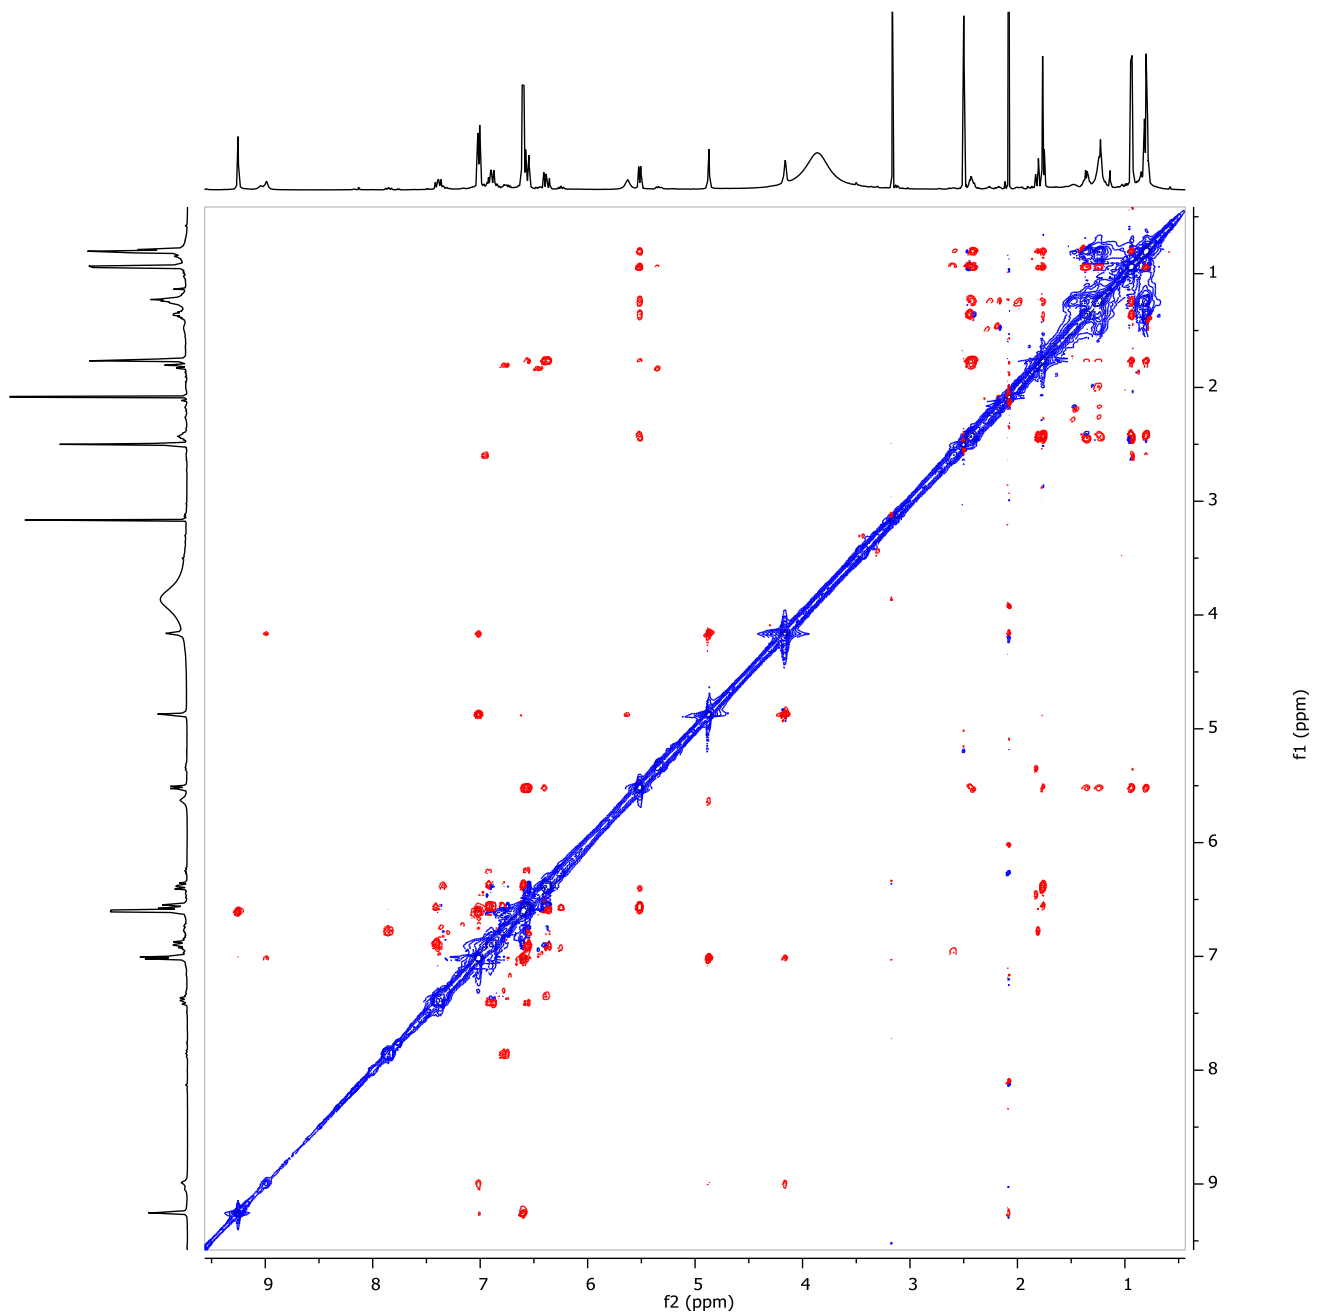

Figure S10. ROESY spectrum of **1** in DMSO-*d*<sub>6</sub> at 500 MHz.

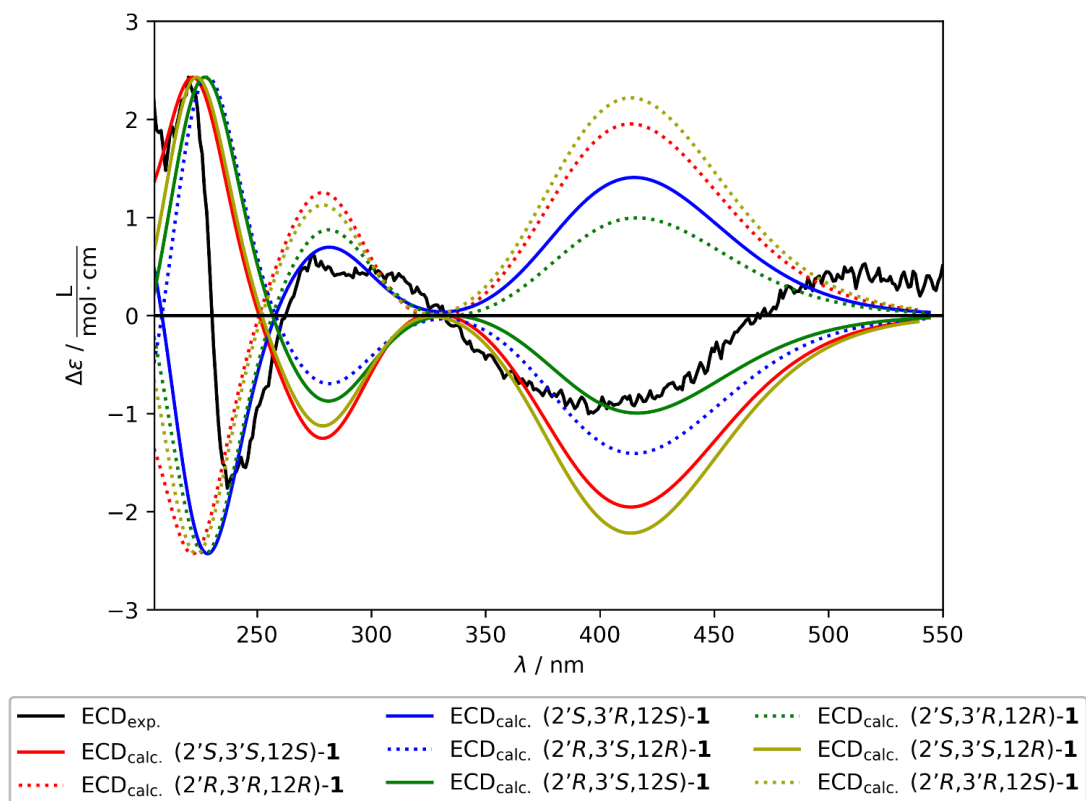

Figure S11. Comparison of experimental (black) and simulated Boltzmann-averaged ECD spectra for compound **1**.

Table S1. Similarity factor (Bruhn et al., 2013) for each calculated stereoisomer of compound **1**.

| Stereoisomer of <b>1</b> | Similarity factor |
|--------------------------|-------------------|
| (2'S,3'S,12S)            | 0.70              |
| (2'S,3'S,12R)            | 0.69              |
| (2'R,3'S,12R)            | 0.61              |
| (2'R,3'S,12S)            | 0.60              |
| (2'S,3'R,12R)            | 0.25              |
| (2'S,3'R,12S)            | 0.24              |
| (2'R,3'R,12S)            | 0.16              |
| (2'R,3'R,12R)            | 0.16              |

Bruhn, T.; Schaumlöffel, A.; Hemberger, Y.; Bringmann, G. SpecDis: quantifying the comparison of calculated and experimental electronic circular dichroism spectra. *Chirality* **2013**, *25*(4), 243–249. doi:10.1002/chir.22138

# Generic Display Report

## Analysis Info

Analysis Name S:\DATA\Maxis\rt020\_RitaToshe\23\_05\MY07955-Rice-S1-F6-R4-F1.2\_32\_01\_11528.d  
Method pos\_säure\_10000\_screening\_ms\_100\_2500\_line.m  
Sample Name MY07955-Rice-S1-F6-R4-F1.2  
Comment Screening01  
Waters Acquity UPLC BEH C\_18 1,7um 2.1x50mm

Acquisition Date 11.05.2023 02:56:01

Operator ate06

Instrument maXis

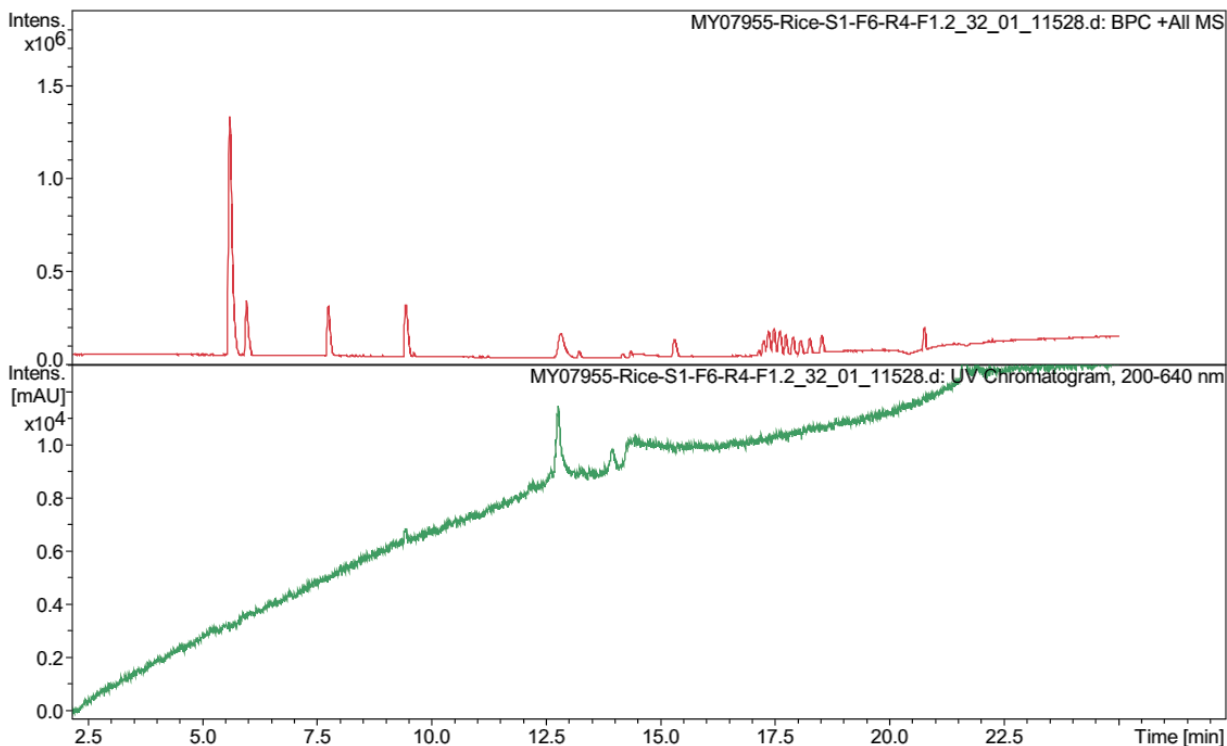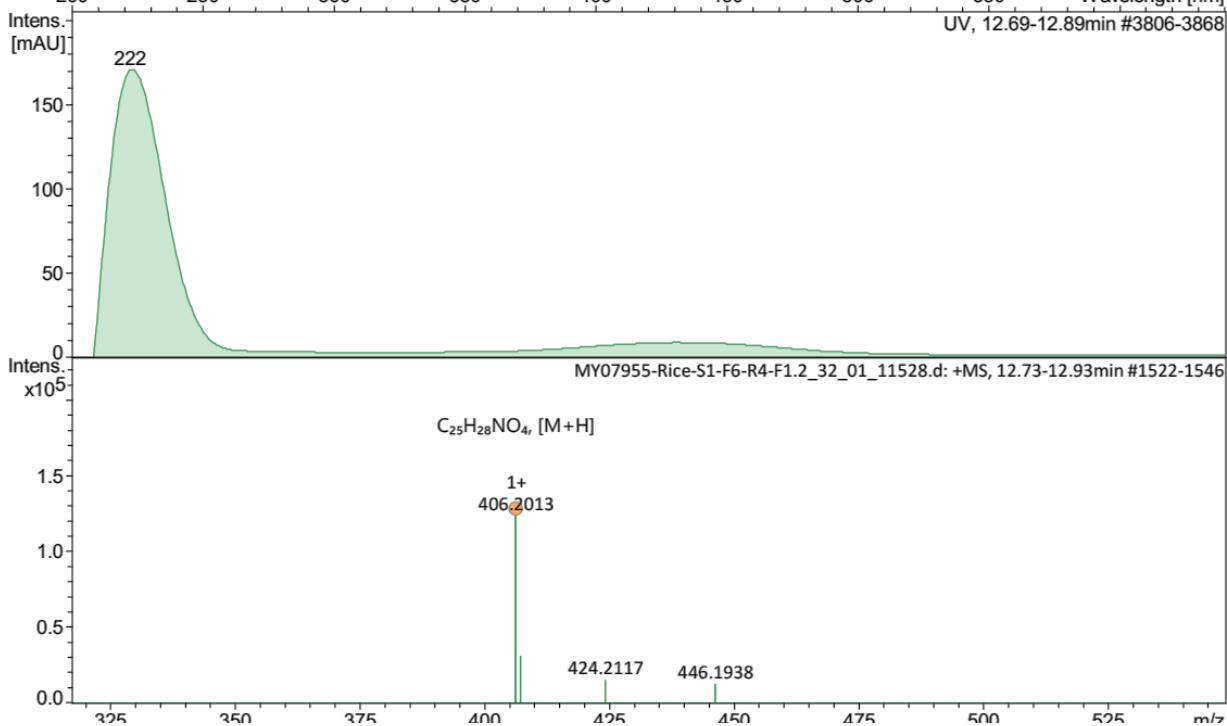

Figure S12. HRESIMS spectrum of **2**.

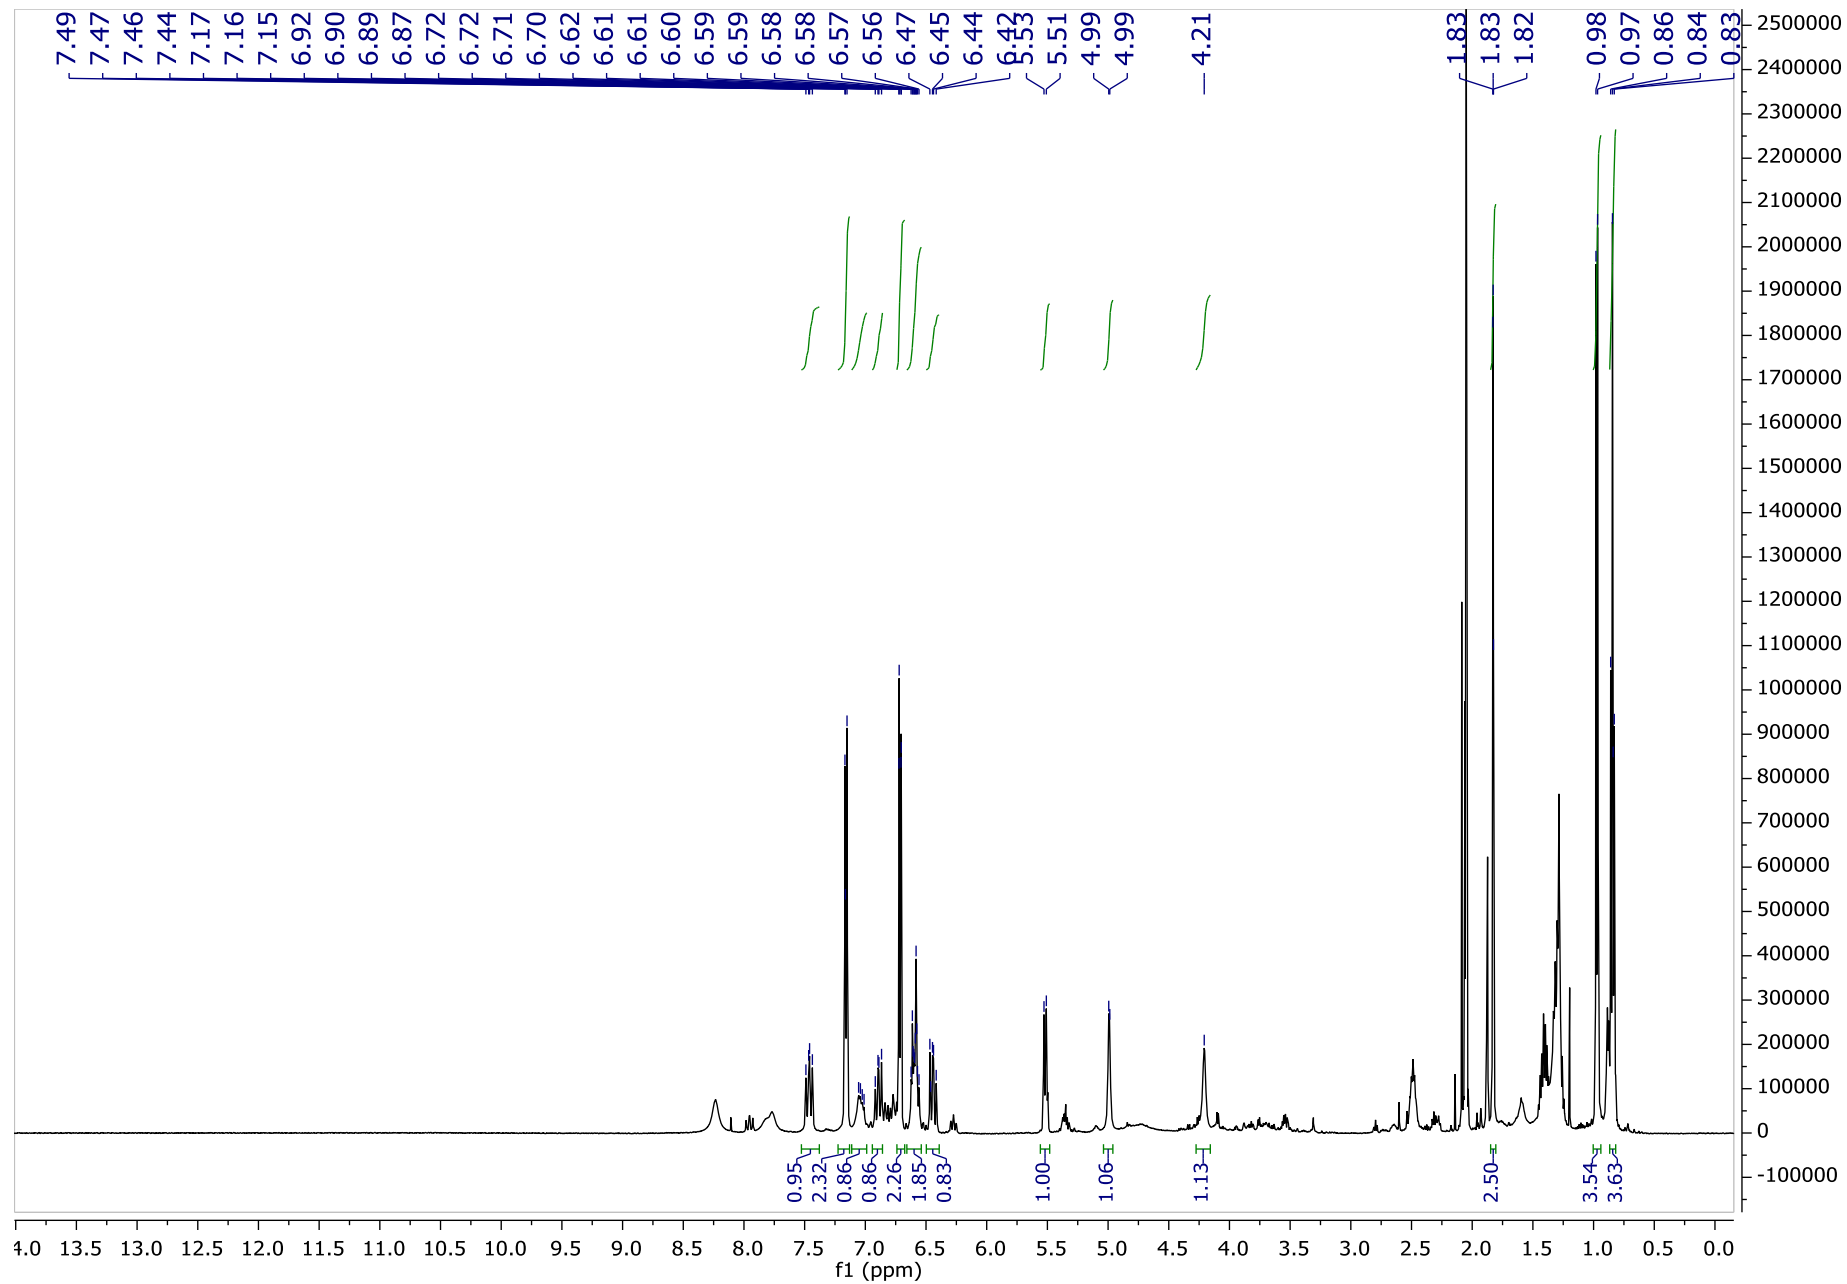

Figure S13.  $^1\text{H}$  NMR spectrum of **2** in acetone- $d_6$  at 500 MHz.

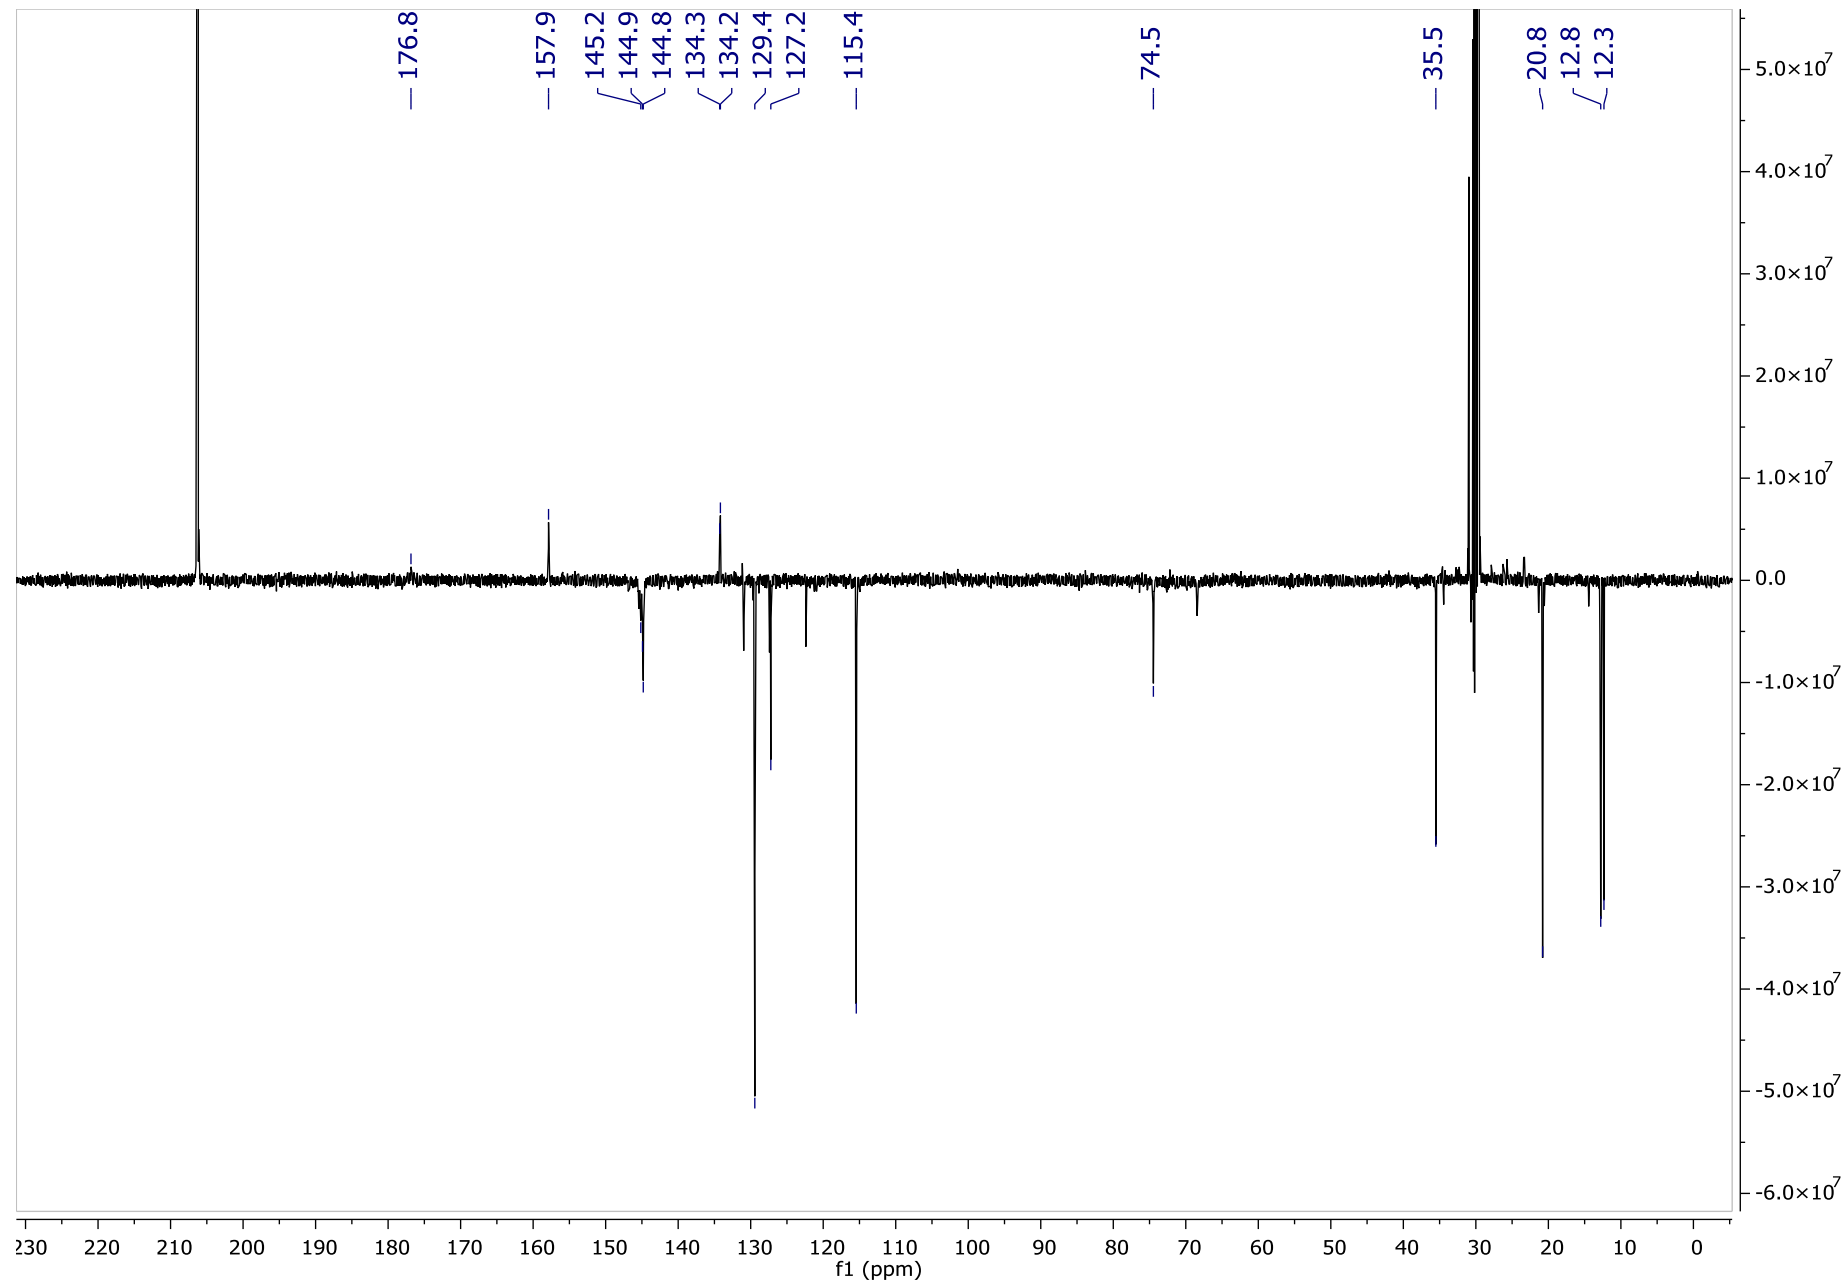

Figure S14. DEPTQ spectrum of **2** in acetone-*d*<sub>6</sub> at 125 MHz.



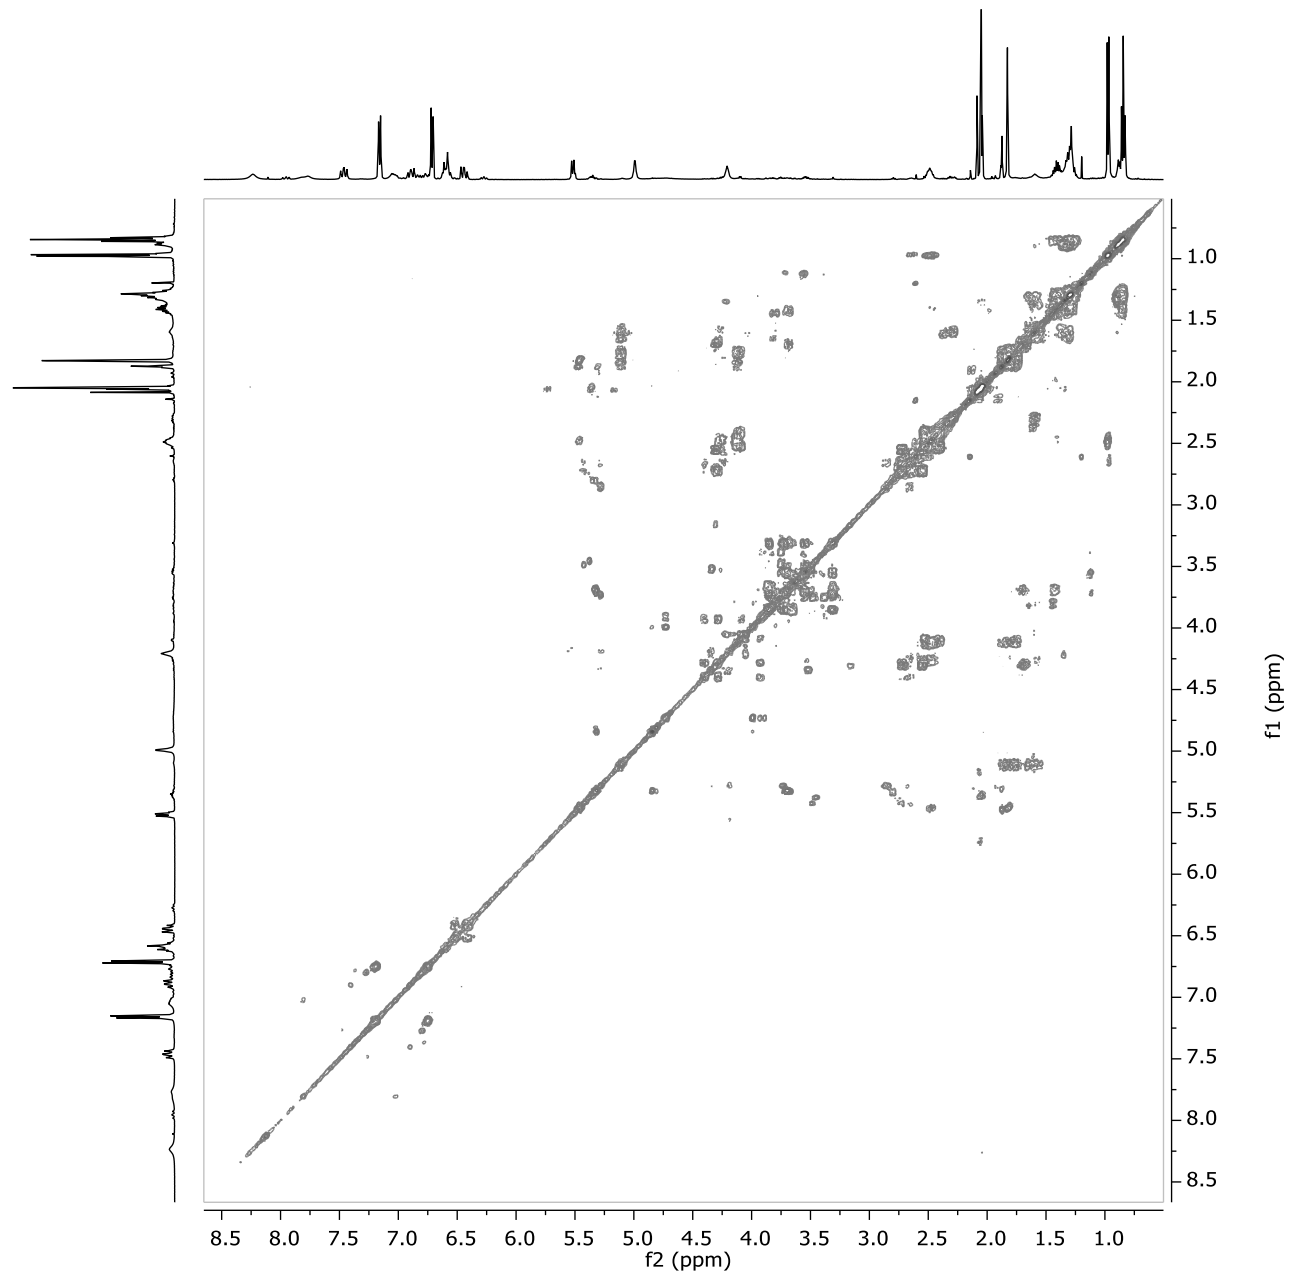

Figure S15.  $^1\text{H}$ - $^1\text{H}$  COSY spectrum of **2** in acetone- $d_6$  at 500 MHz.

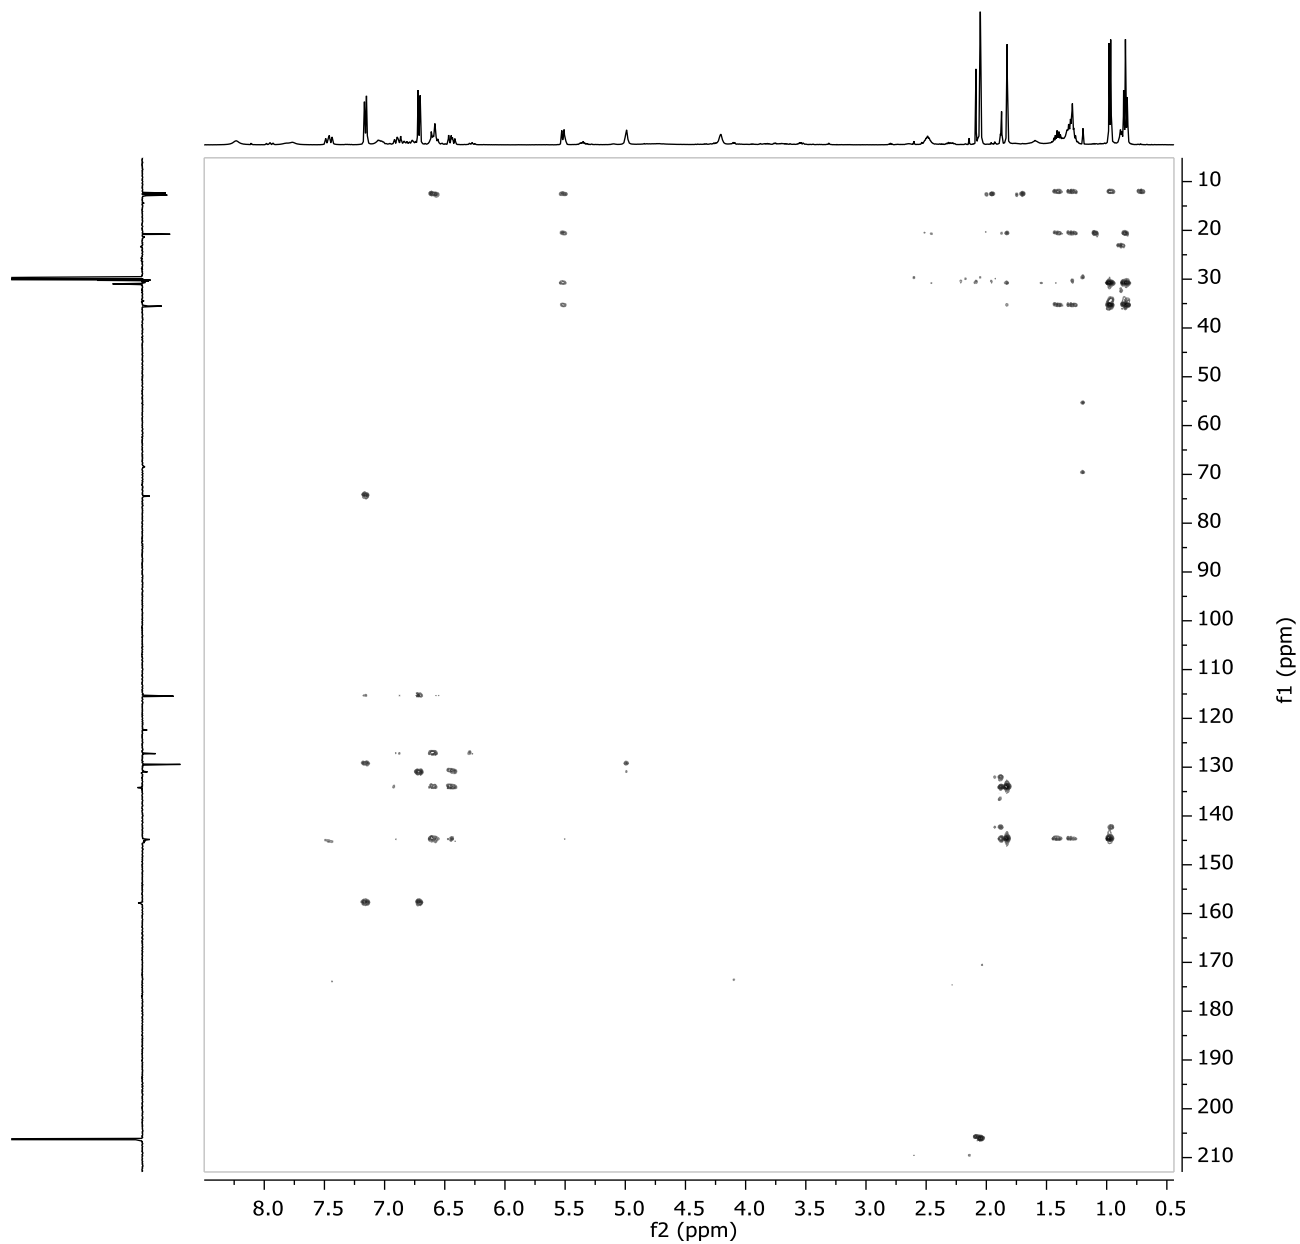

Figure S16. HMBC spectrum of **2** in acetone-*d*<sub>6</sub> at 500 MHz.

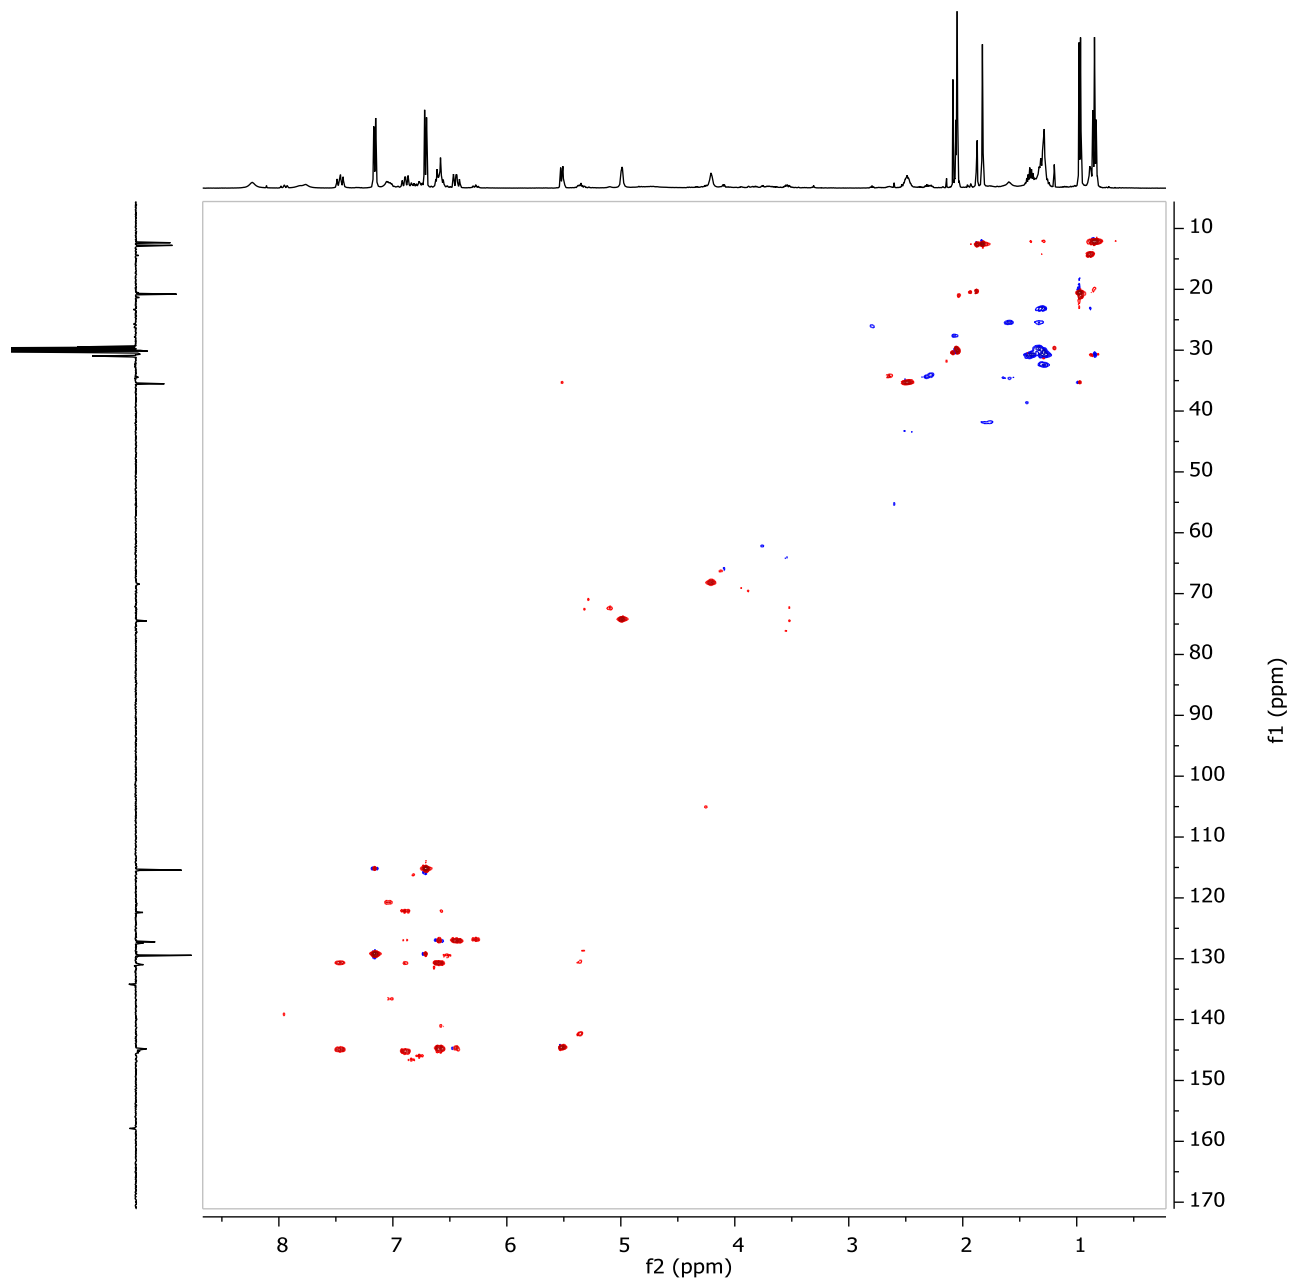

Figure S17. HSQC spectrum of **2** in acetone- $d_6$  at 500 MHz.

# Generic Display Report

## Analysis Info

Analysis Name S:\DATA\MaXis\rt020\_Rita Toshe\23\_05\MY07955-Rice-S1-F6-R4-F2.2\_34\_01\_11530.d  
Method pos\_säure\_10000\_screening\_ms\_100\_2500\_line.m  
Sample Name MY07955-Rice-S1-F6-R4-F2.2  
Comment Screening01  
Waters Acquity UPLC BEH C\_18 1,7um 2.1x50mm

Acquisition Date 11.05.2023 03:58:02

Operator ate06

Instrument maXis

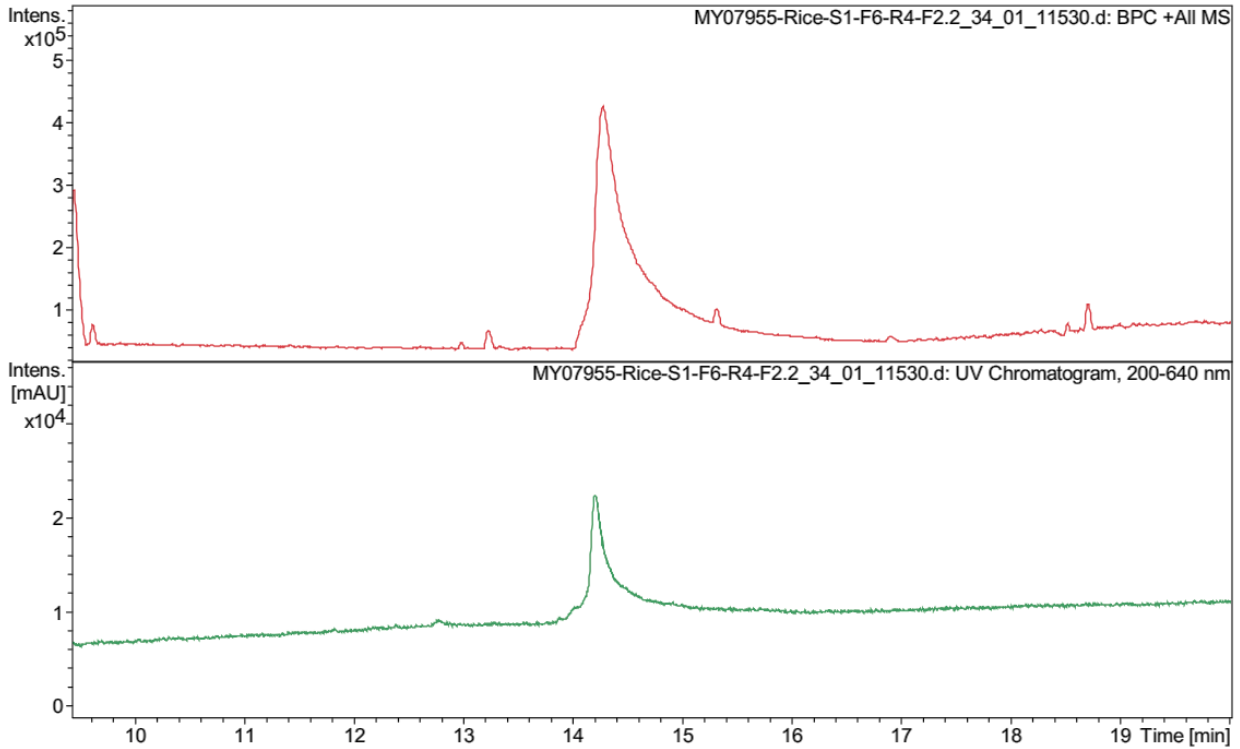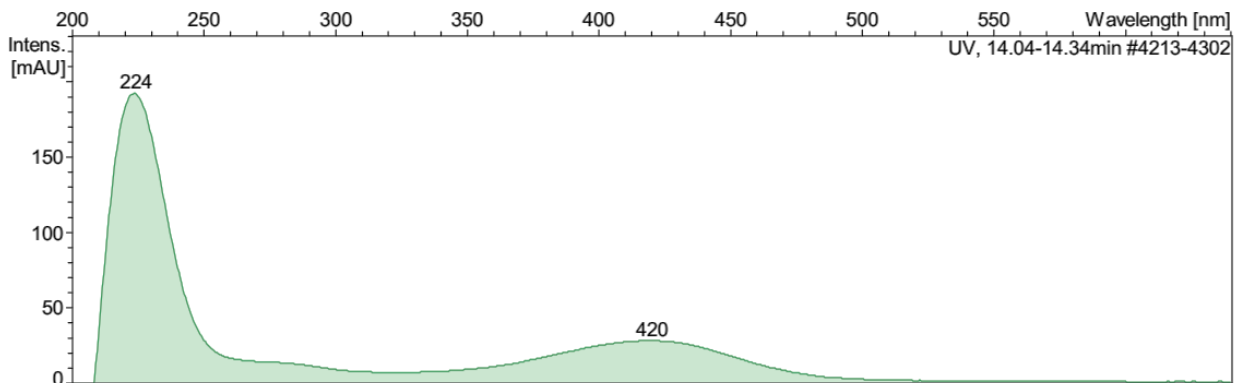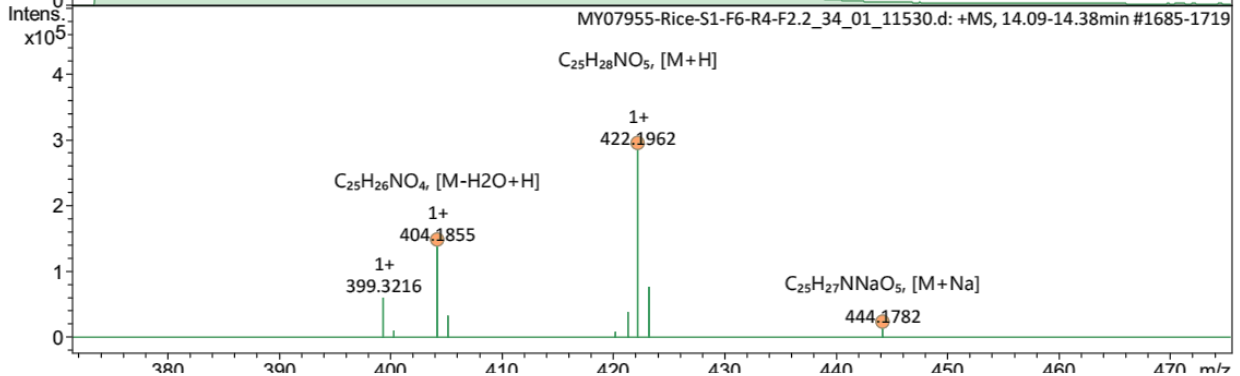

Figure S18. HRESIMS spectrum of 3.

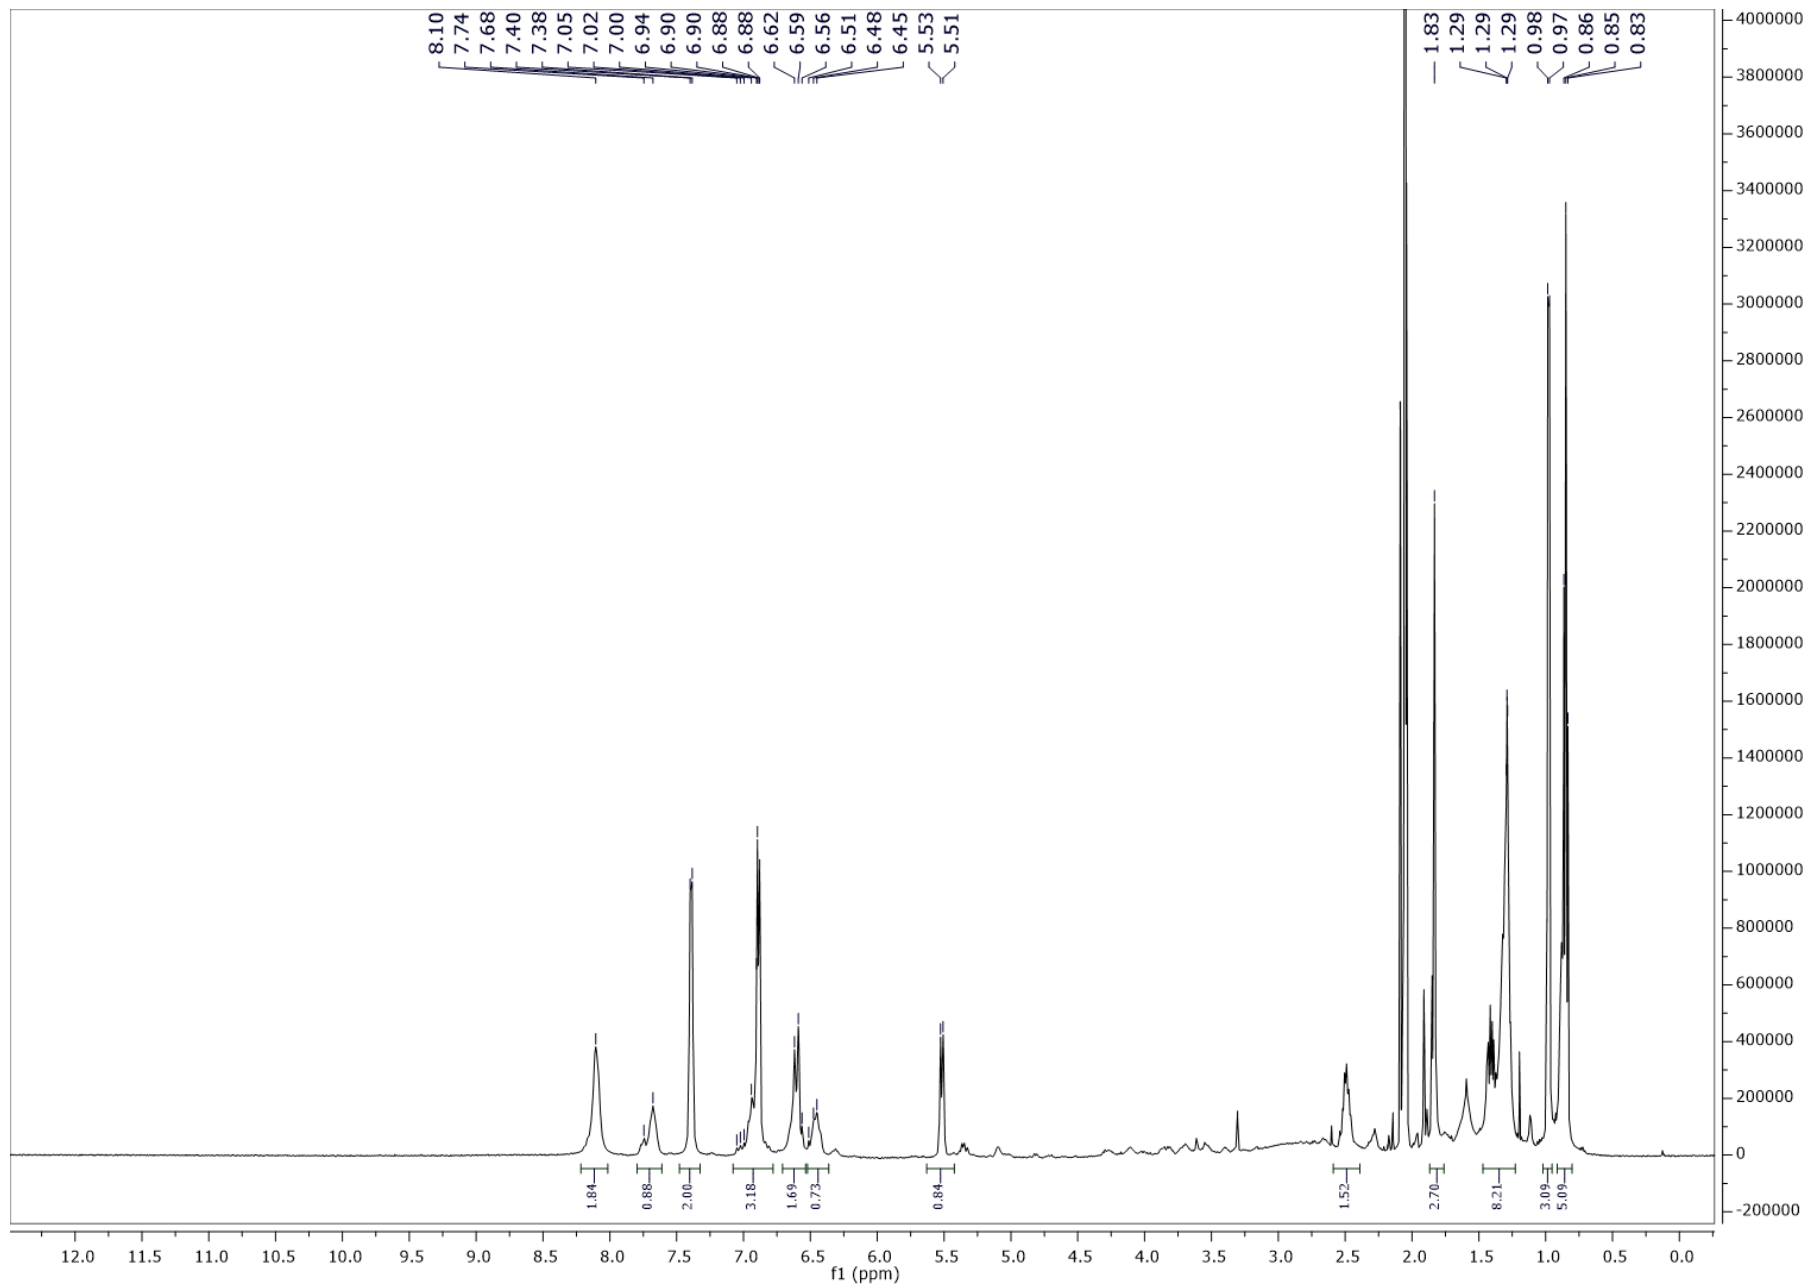

Figure S19.  $^1\text{H}$  NMR spectrum of **3** in acetone- $d_6$  at 500 MHz.

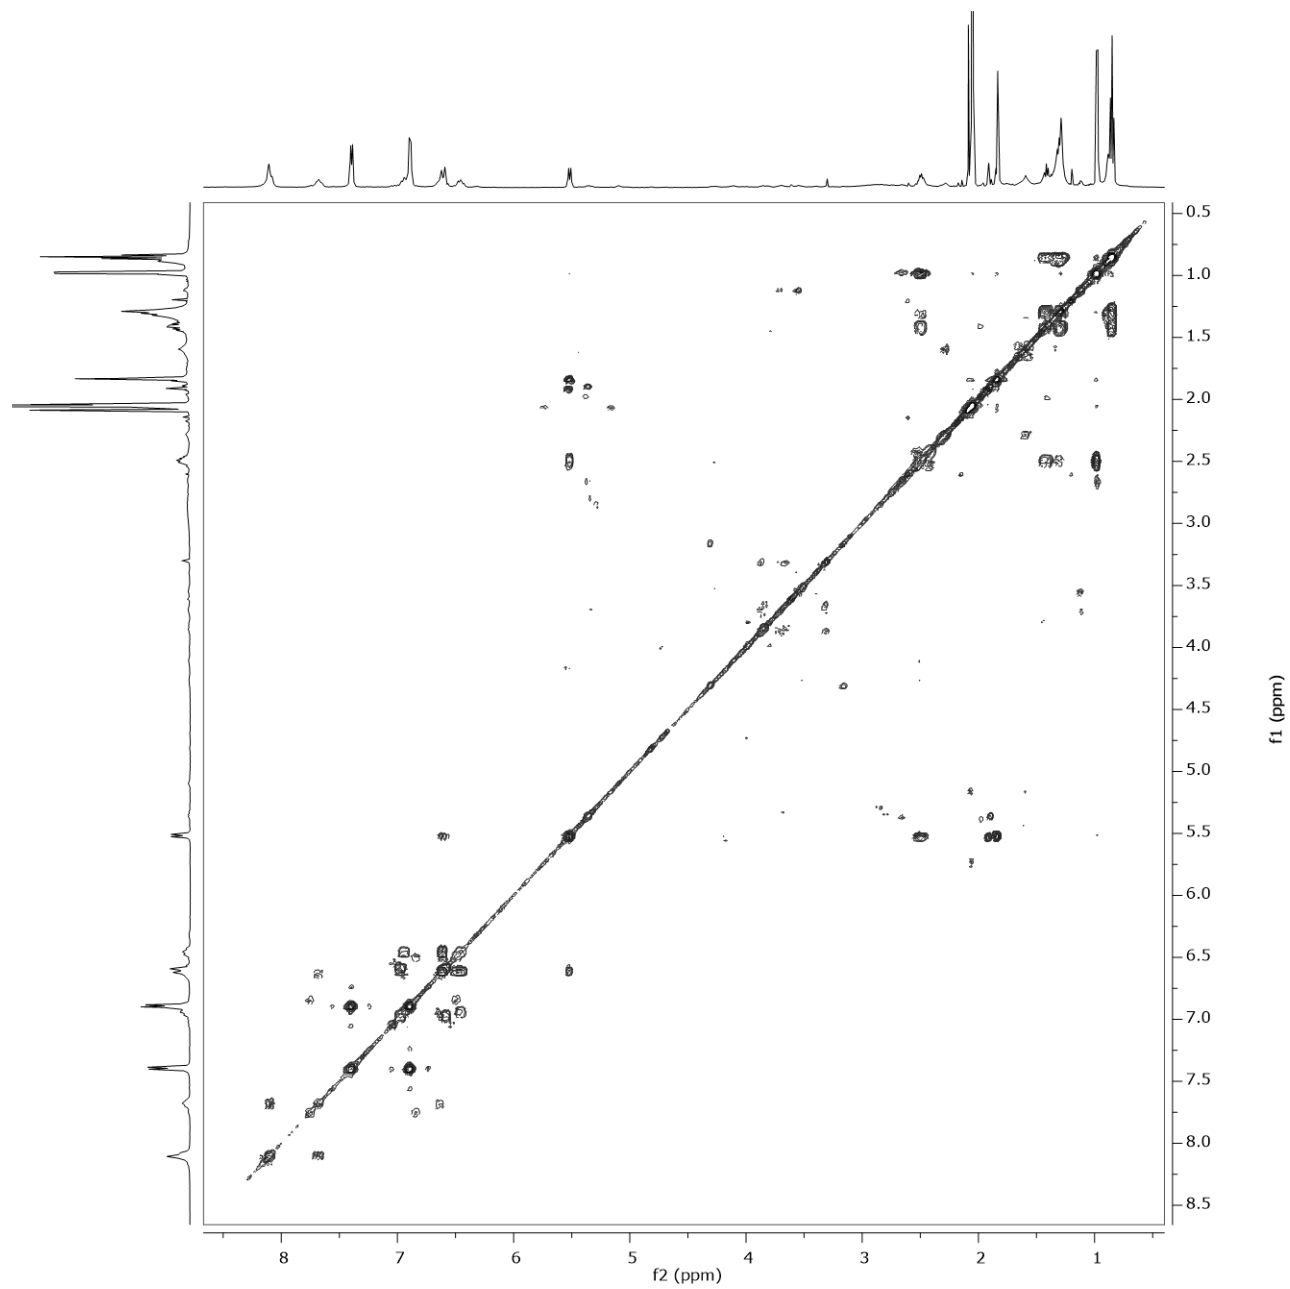

Figure S20.  $^1\text{H}$ - $^1\text{H}$  COSY spectrum of **3** in acetone- $d_6$  at 500 MHz.

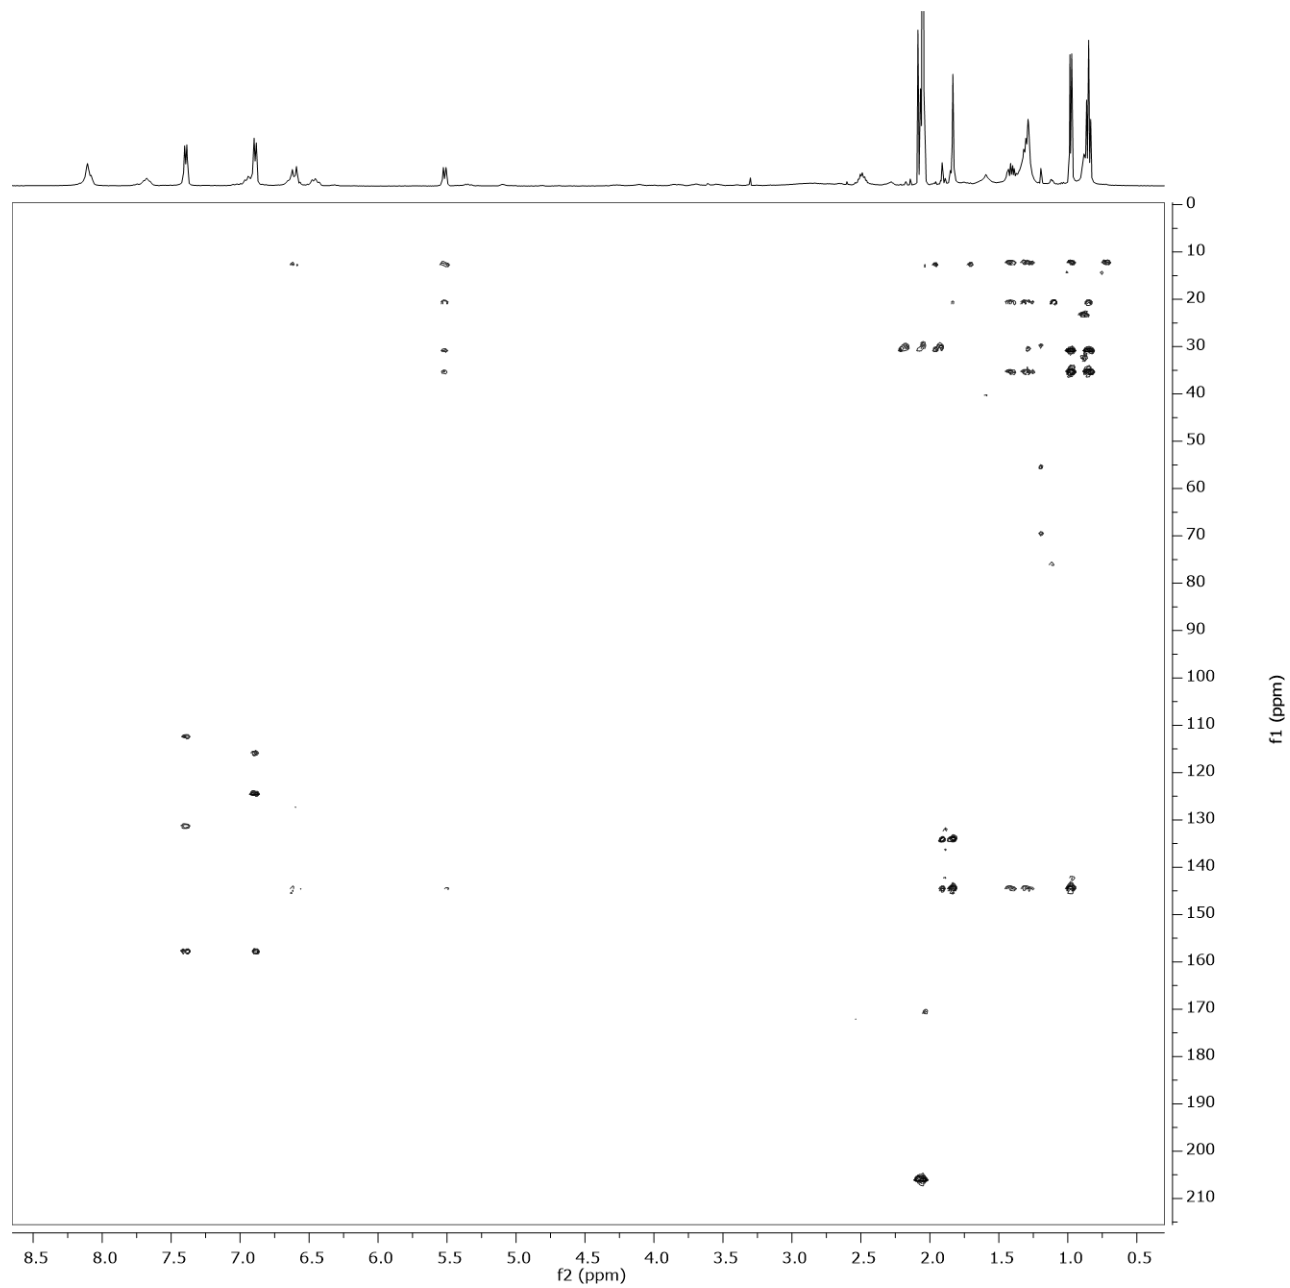

Figure S21. HMBC spectrum of **3** in acetone-*d*<sub>6</sub> at 500 MHz.

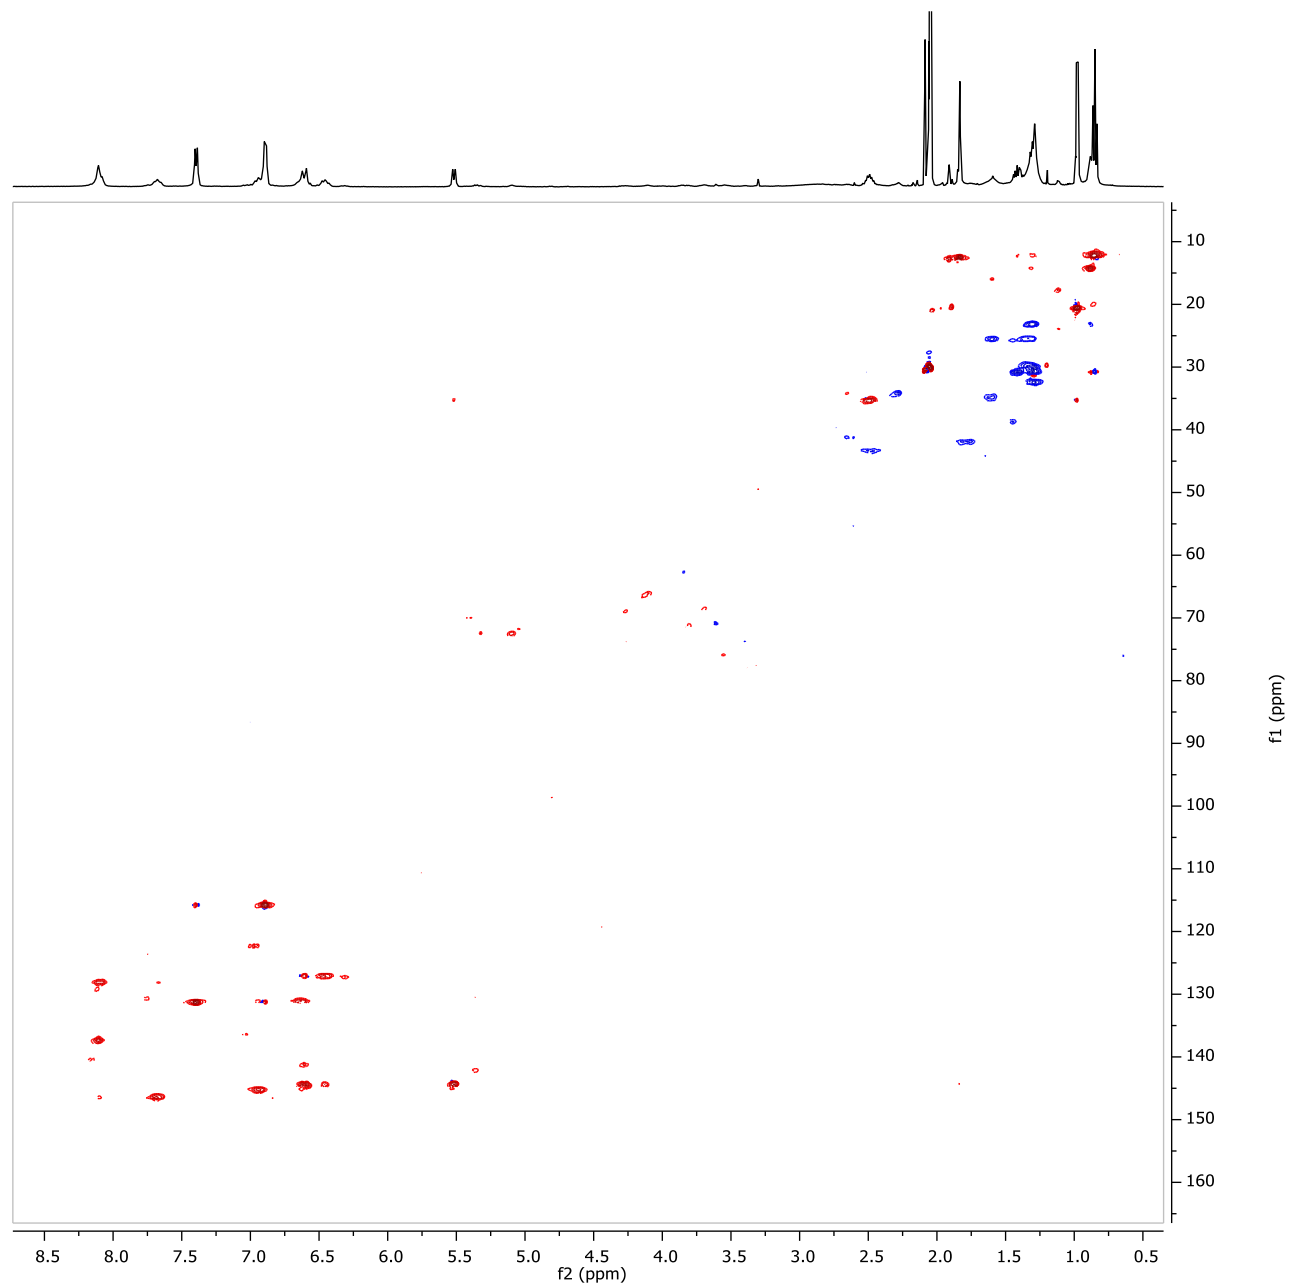

Figure S22. HSQC spectrum of **3** in acetone-*d*<sub>6</sub> at 500 MHz.



# Generic Display Report

## Analysis Info

Analysis Name S:\DATA\maXis\sel22\_SherifElsayed\23\_07\F08-F08\_5\_01\_12318.d  
Method pos\_säure\_10000\_screening\_ms\_100\_2500\_line.m  
Sample Name F08-F08  
Comment Screening01  
Waters Acquity UPLC BEH C\_18 1,7um 2.1x50mm

Acquisition Date 12.07.2023 17:10:50  
Operator ate06  
Instrument maXis

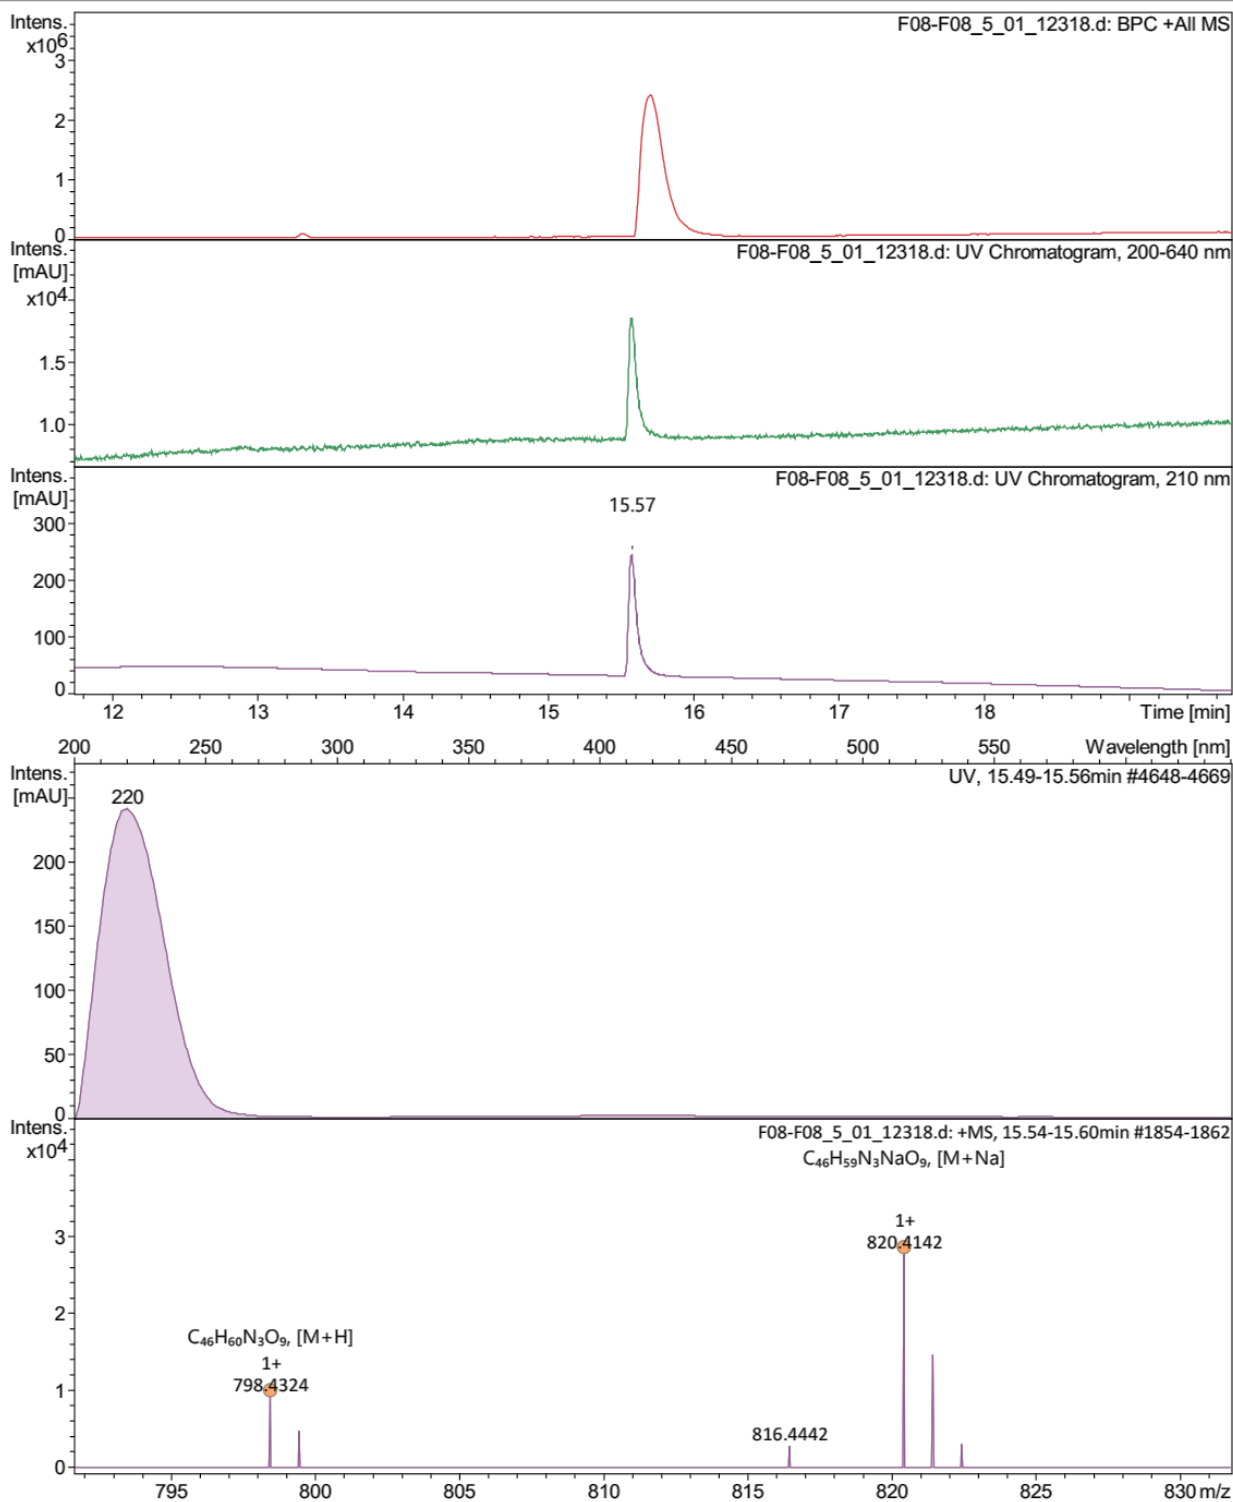

Figure S23. HRESIMS spectrum of 4.

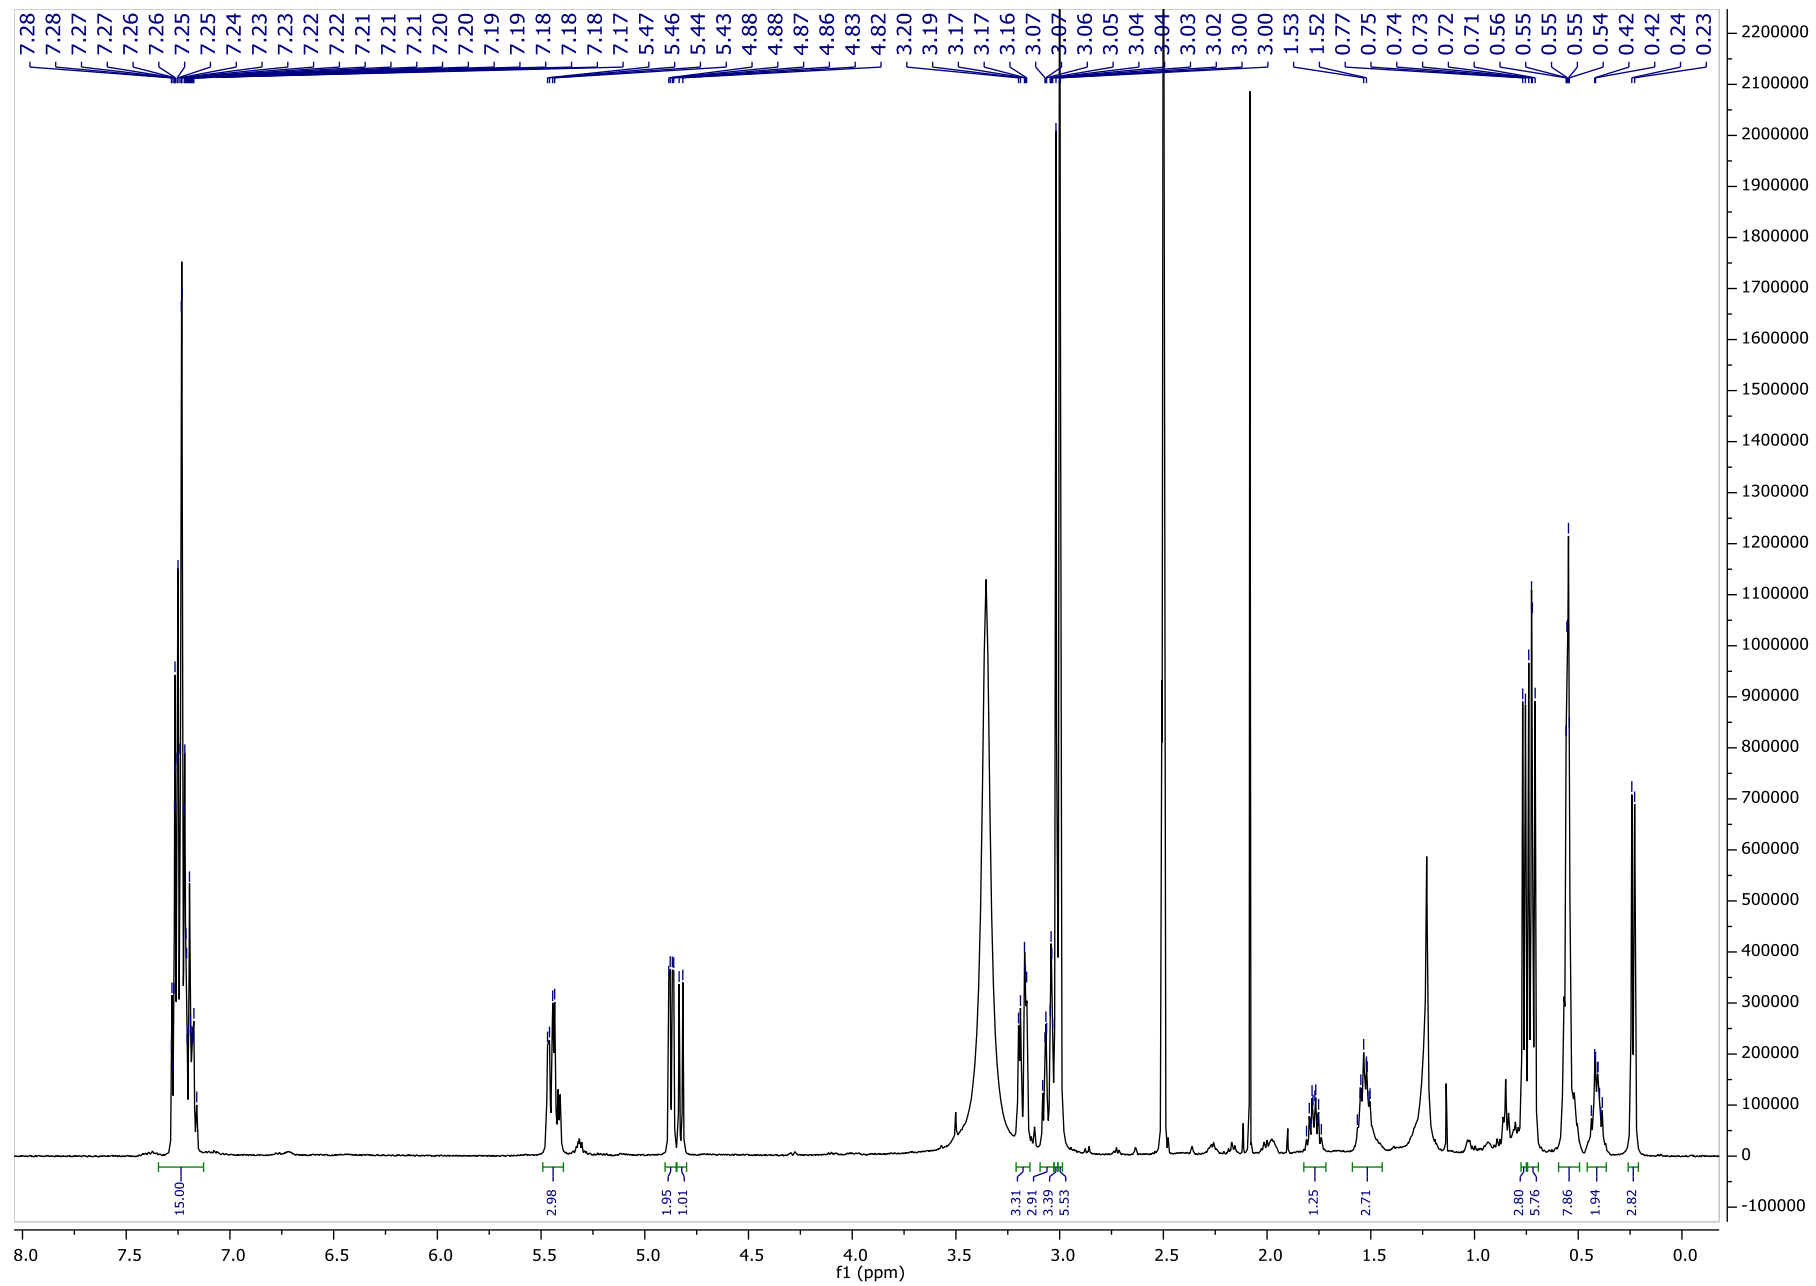

Figure S24. <sup>1</sup>H NMR spectrum of **4** in DMSO-*d*<sub>6</sub> at 500 MHz.

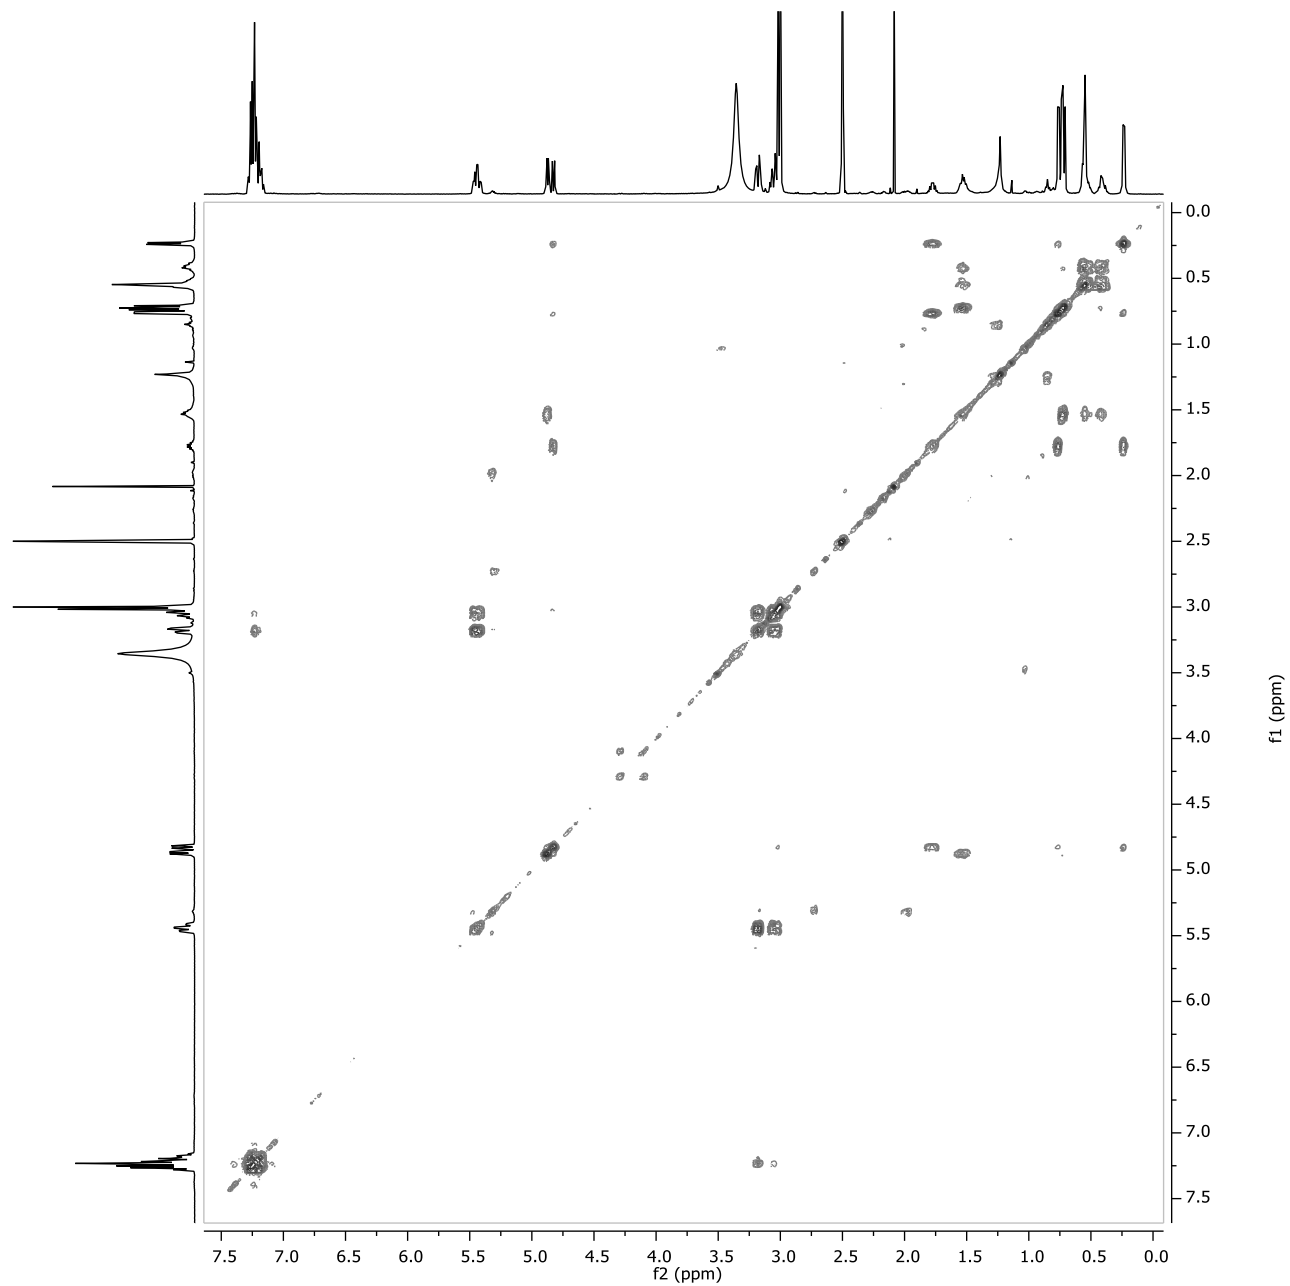

Figure S25.  $^1\text{H}$ - $^1\text{H}$  COSY spectrum of **4** in  $\text{DMSO-}d_6$  at 500 MHz.

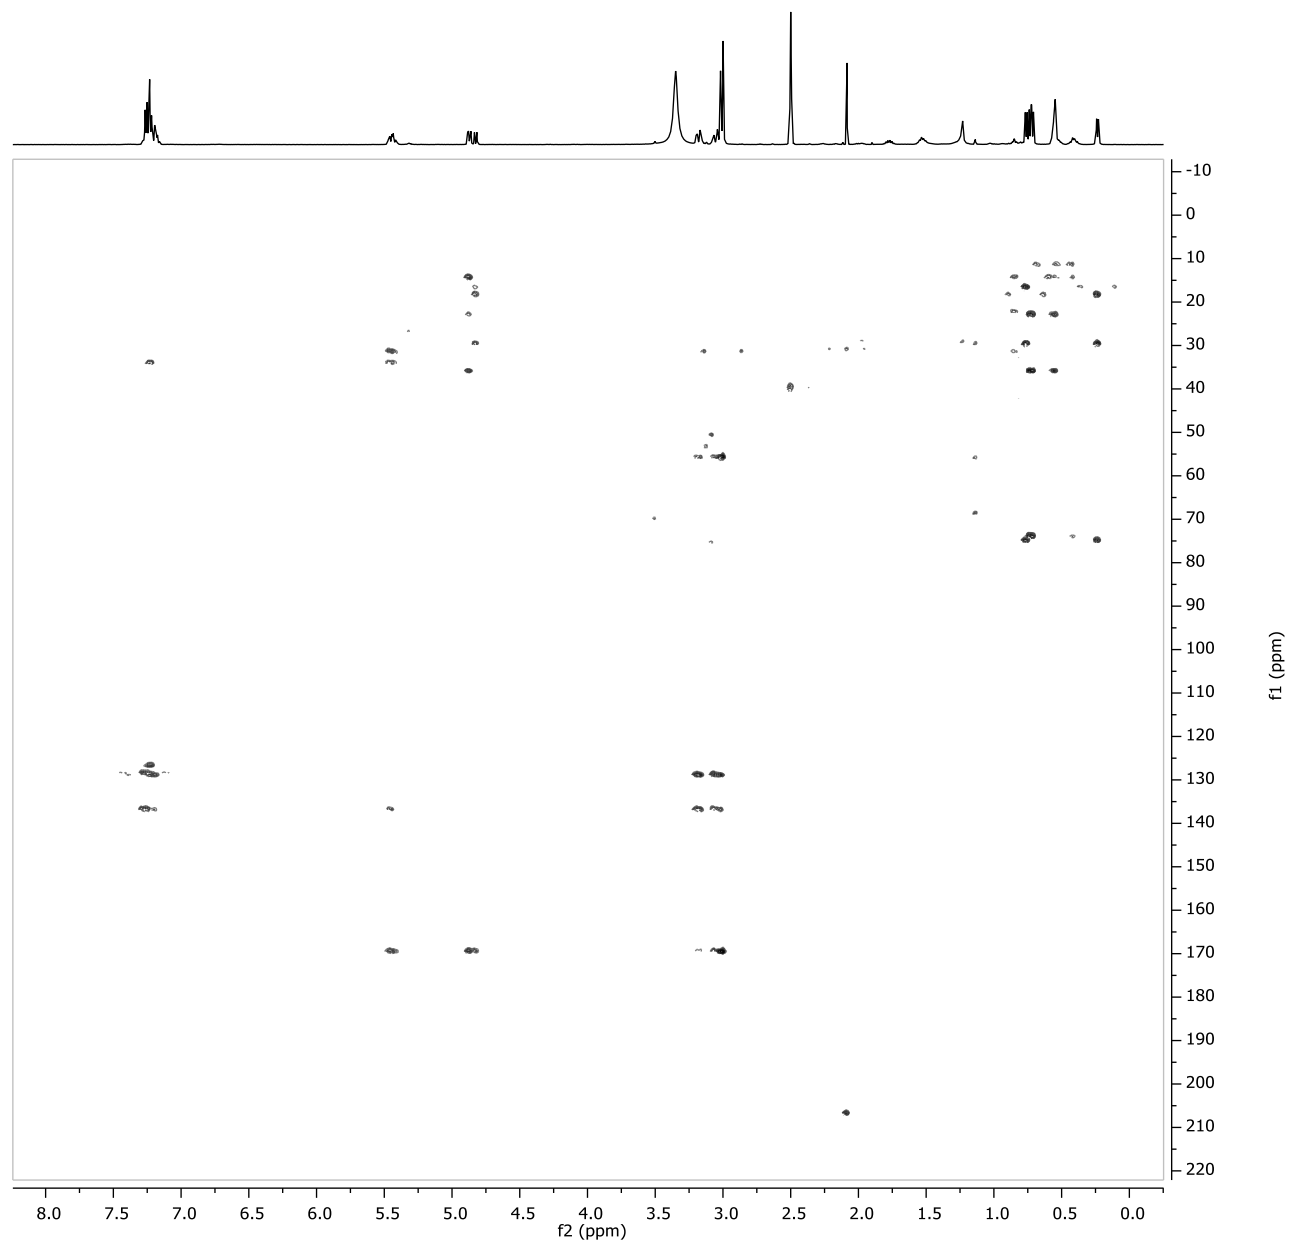

Figure S26. HMBC spectrum of **4** in DMSO-*d*<sub>6</sub> at 500 MHz.

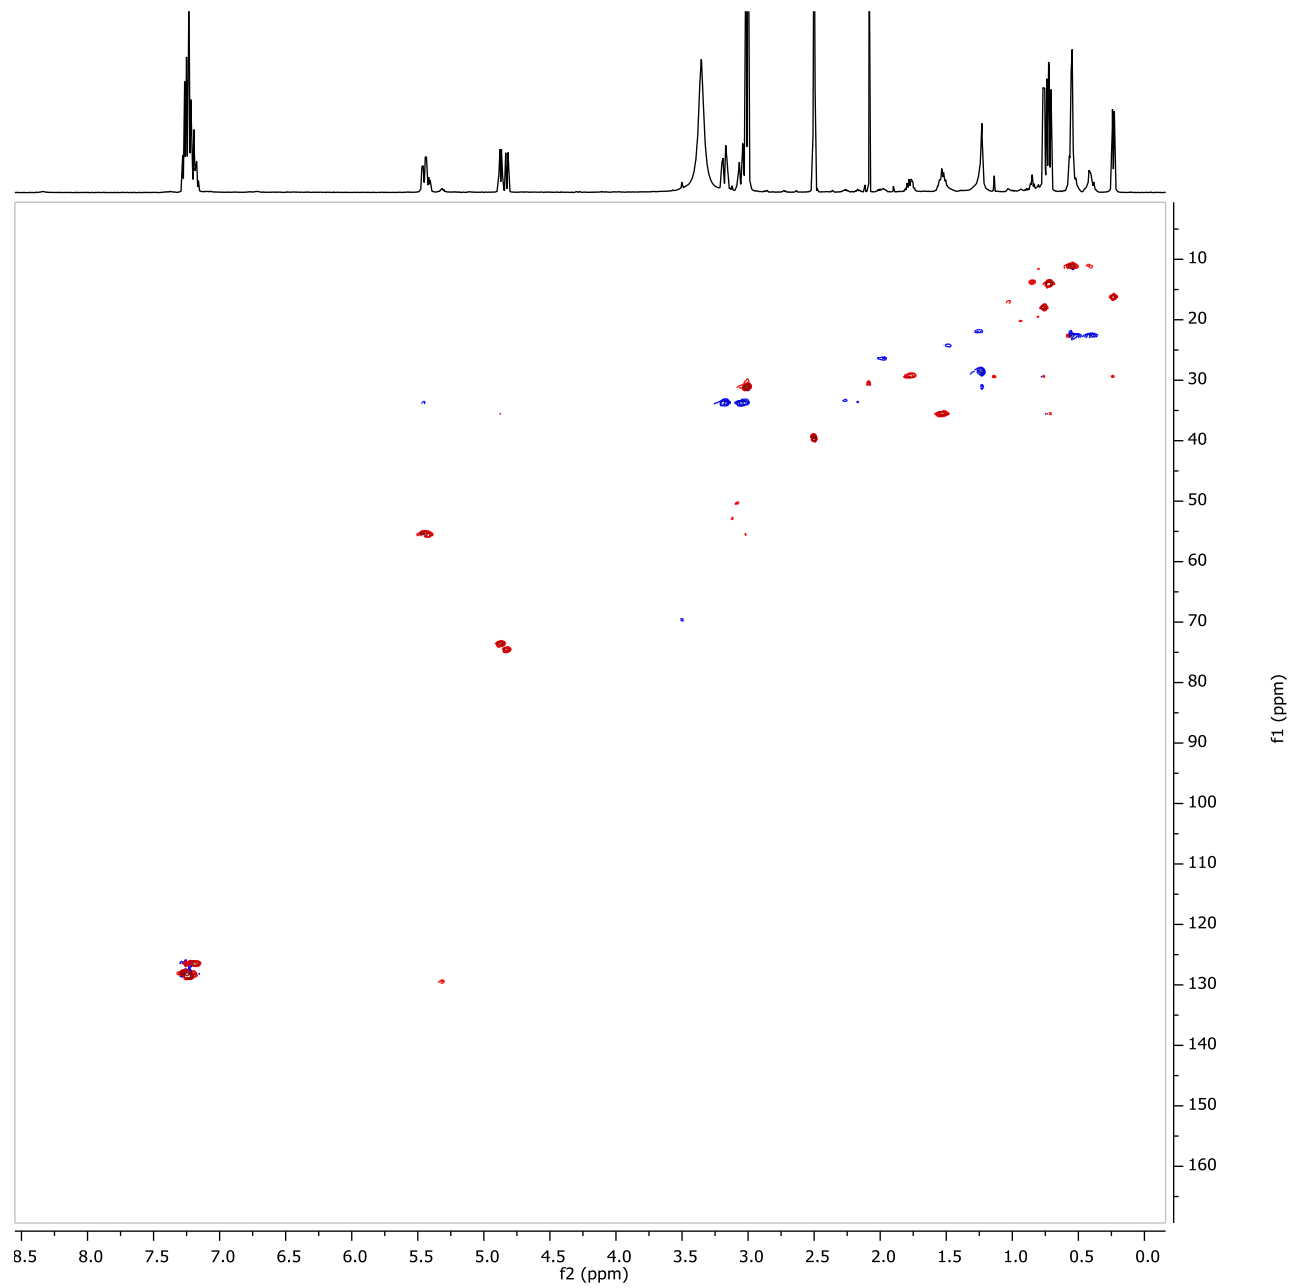

Figure S27. HSQC spectrum of **4** in  $\text{DMSO-}d_6$  at 500 MHz.

# Generic Display Report

## Analysis Info

Analysis Name S:\DATA\Maxis\sel22\_SherifElsayed\23\_07\F04-F13\_4\_01\_12317.d  
Method pos\_säure\_10000\_screening\_ms\_100\_2500\_line.m  
Sample Name F04-F13  
Comment Screening01  
Waters Acquity UPLC BEH C\_18 1,7um 2.1x50mm

Acquisition Date 12.07.2023 16:39:53  
Operator ate06  
Instrument maXis

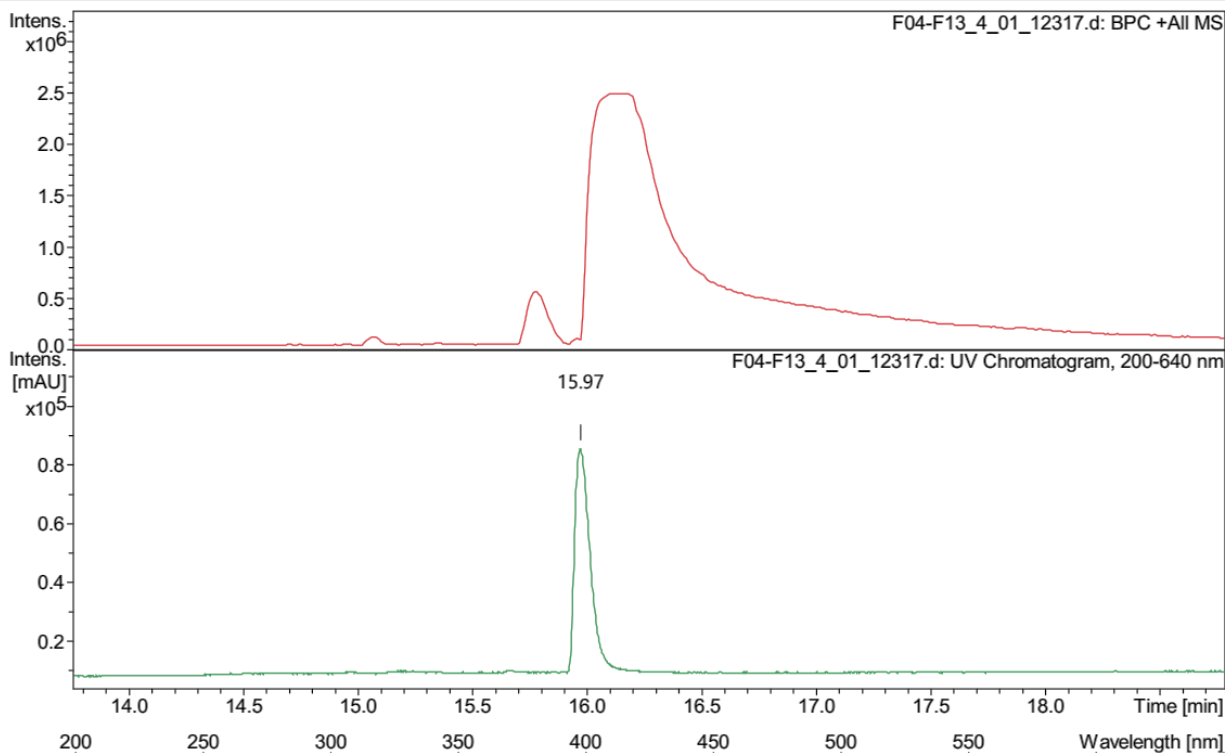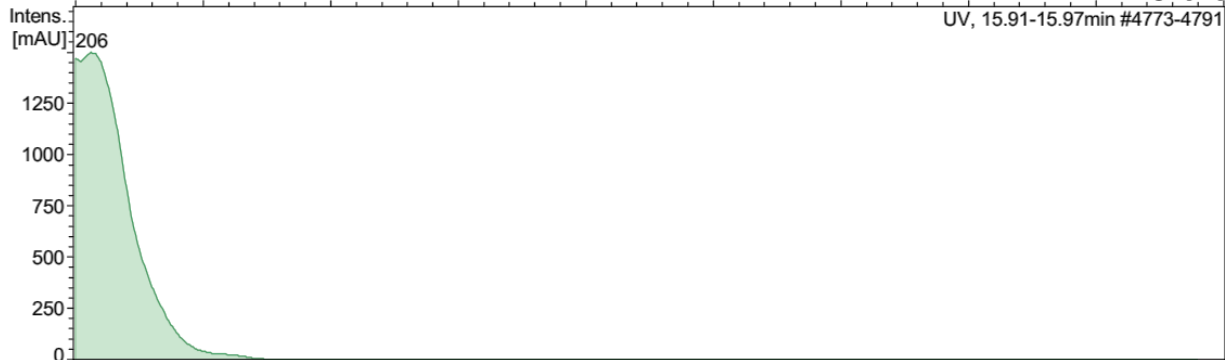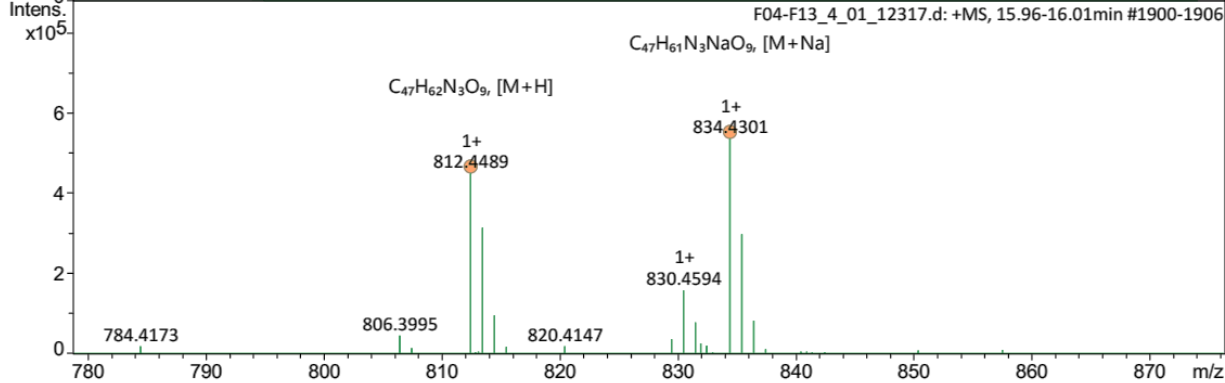

Figure S28. HRESIMS spectrum of 5.

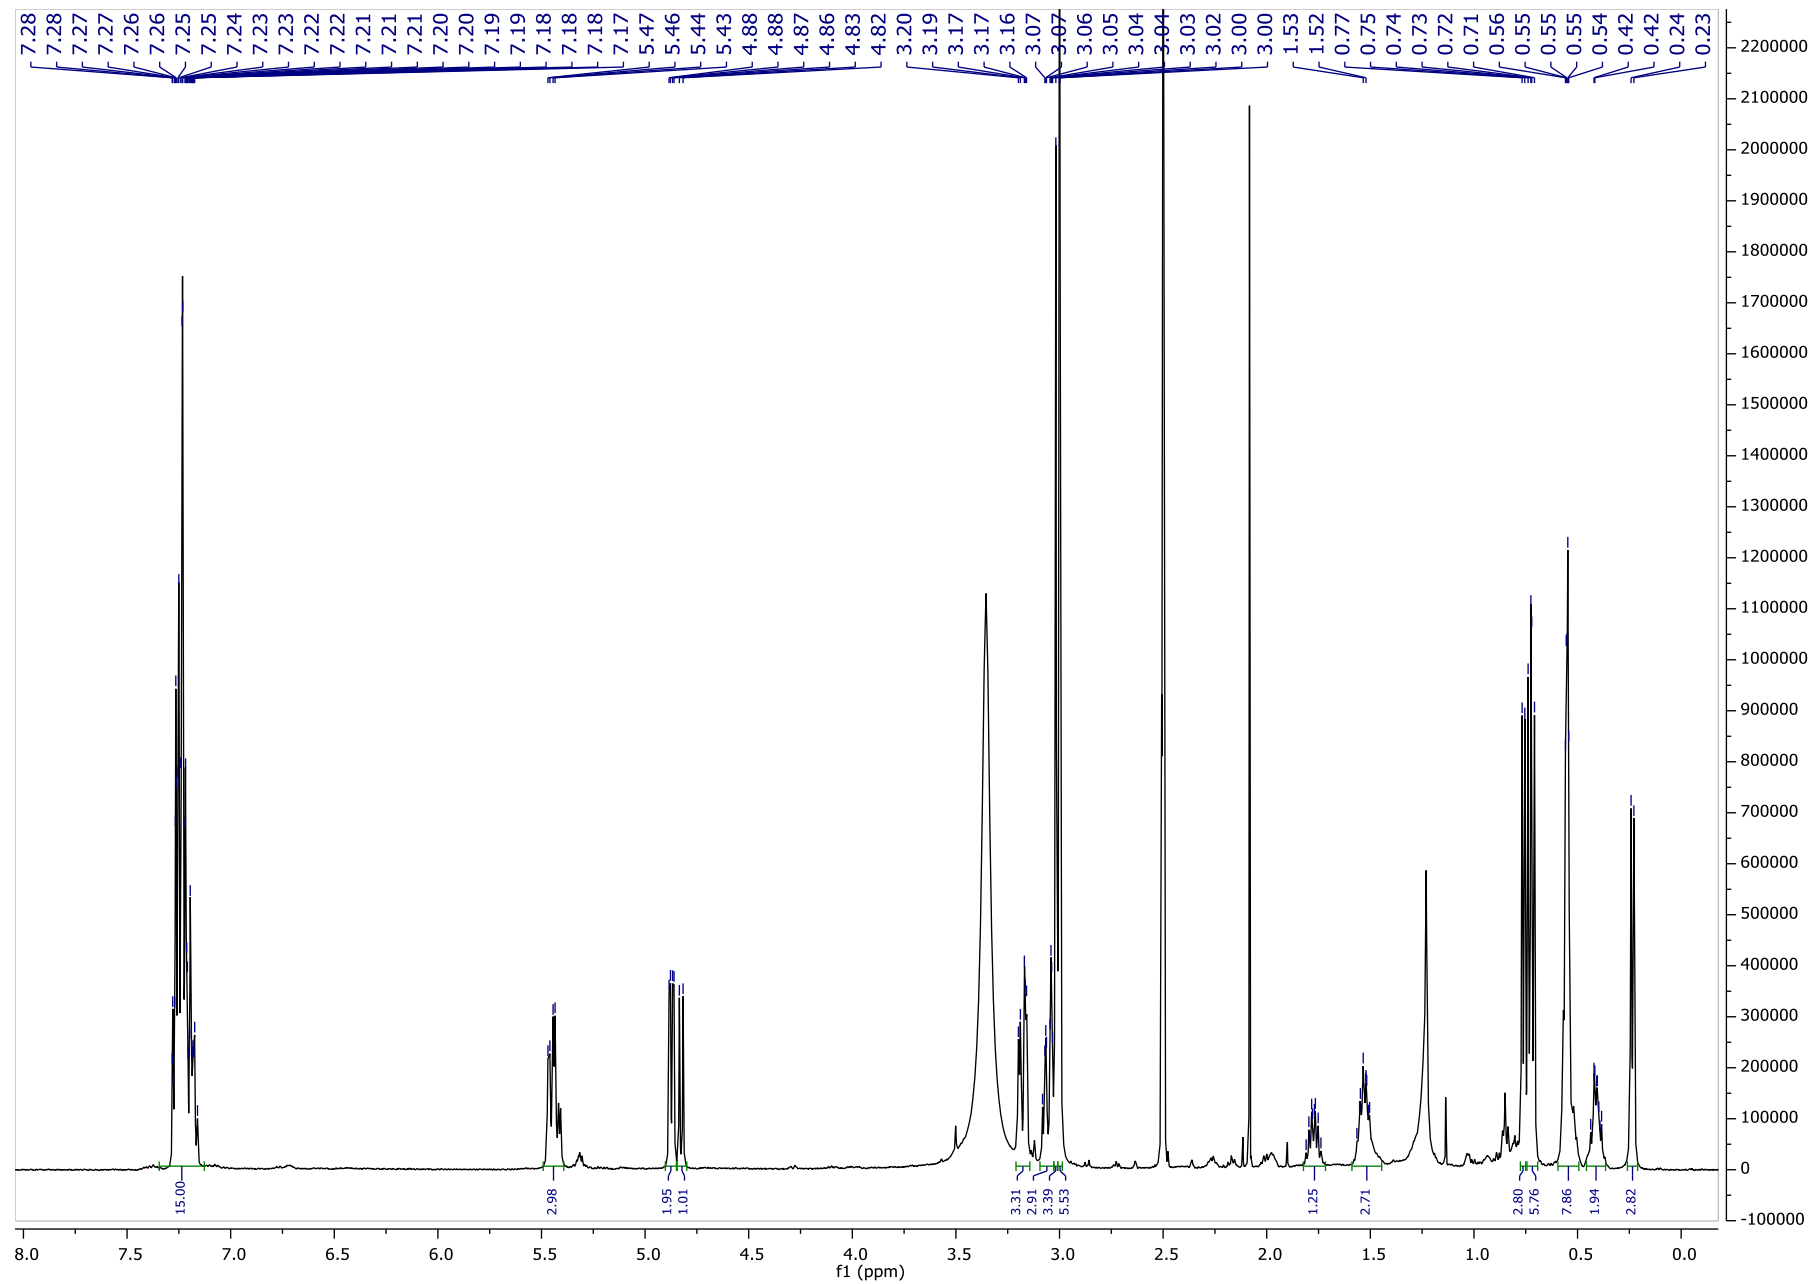

Figure S29.  $^1\text{H}$  NMR spectrum of **5** in  $\text{DMSO-}d_6$  at 500 MHz.

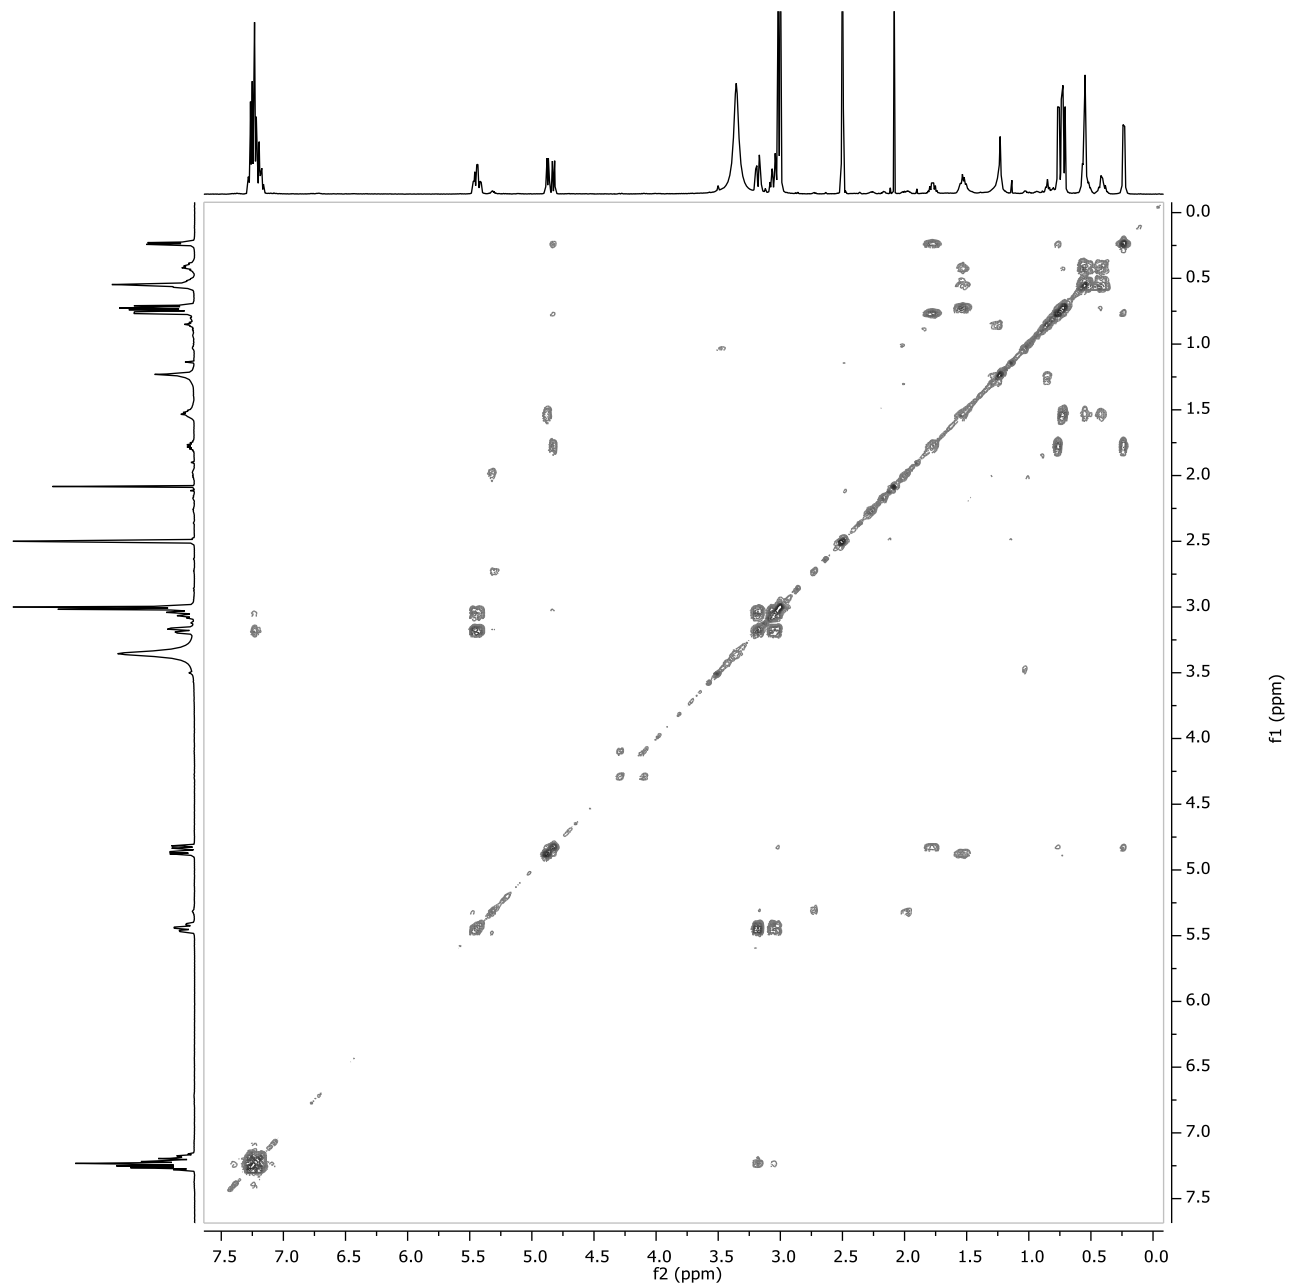

Figure S30.  $^1\text{H}$ - $^1\text{H}$  COSY spectrum of **5** in  $\text{DMSO-}d_6$  at 500 MHz.



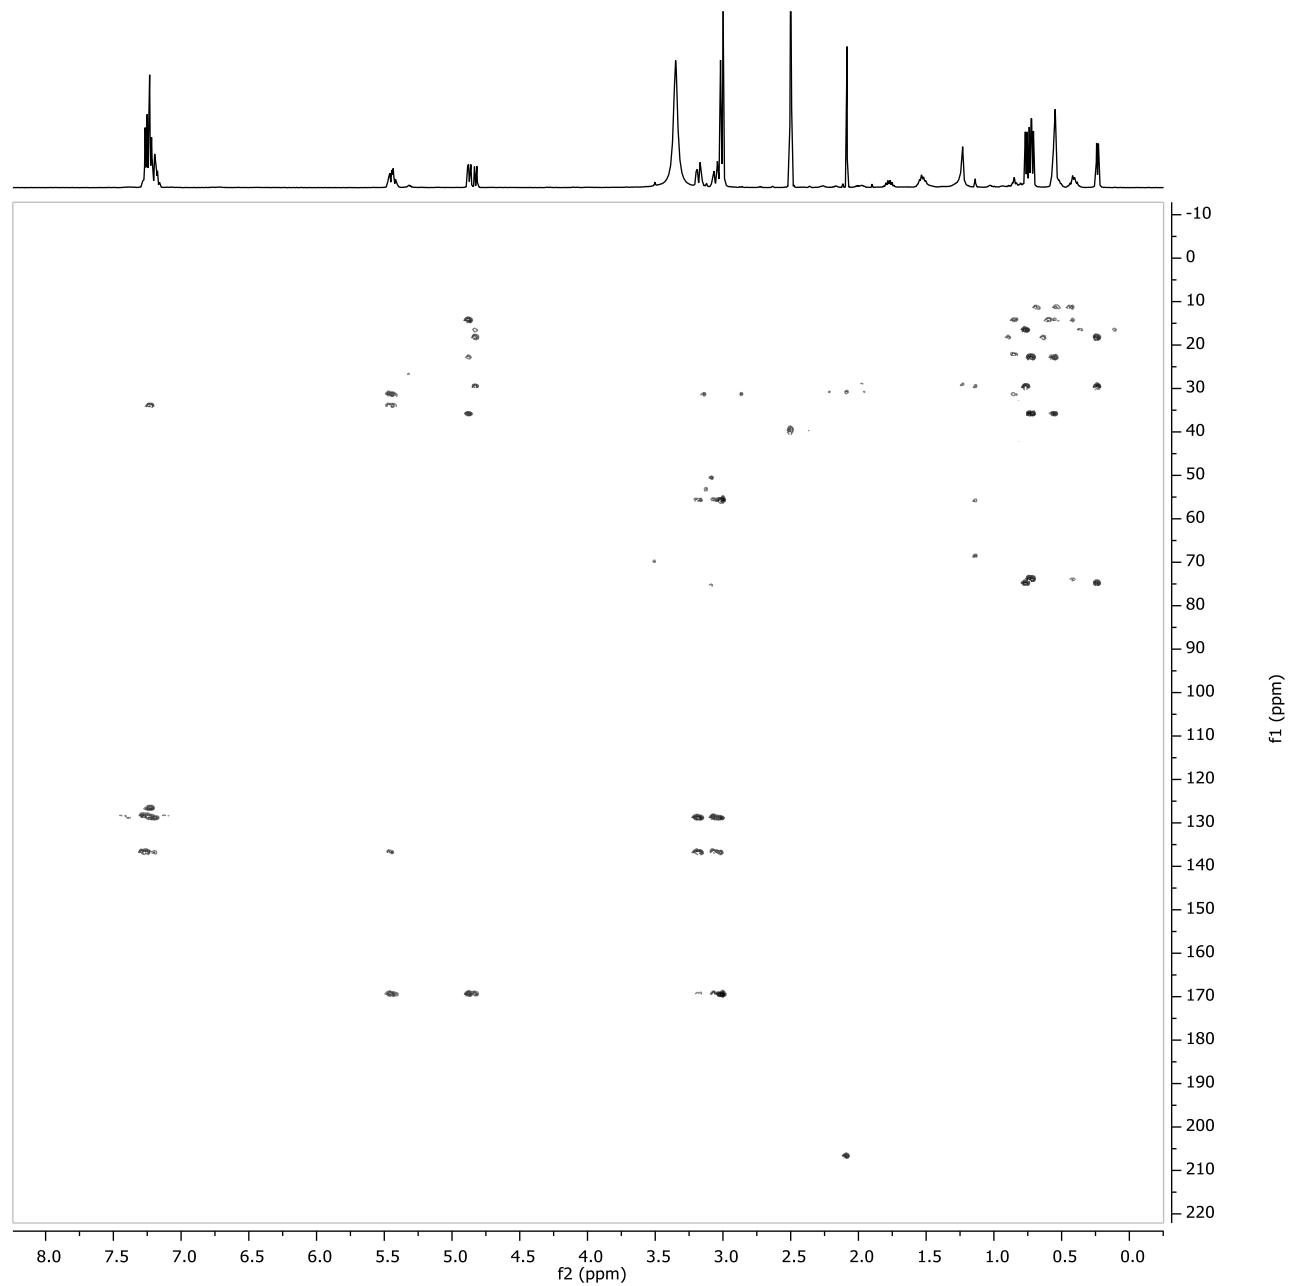

Figure S31. HMBC spectrum of **5** in DMSO-*d*<sub>6</sub> at 500 MHz.

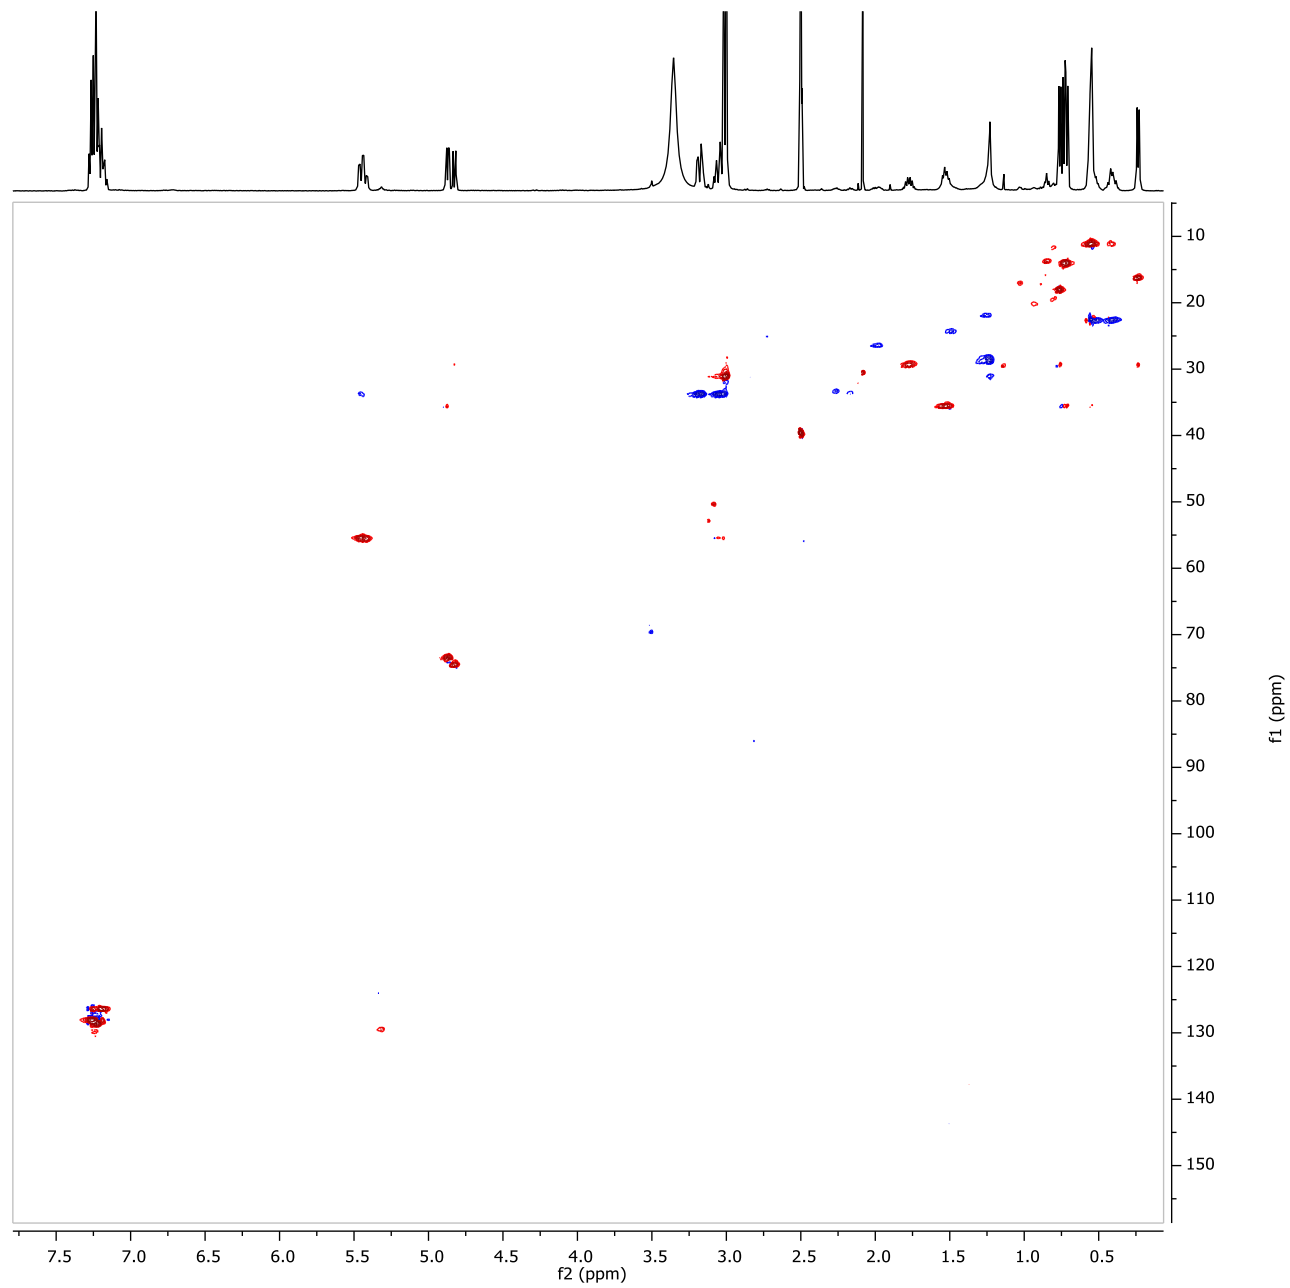

Figure S32. HSQC spectrum of **5** in DMSO-*d*<sub>6</sub> at 500 MHz.

# Generic Display Report

## Analysis Info

Analysis Name S:\DATA\MaXis\rt020\_RitaToshe\23\_08\MY07955-Rice-S1-F03-F13\_43\_01\_12784.d  
Method pos\_säure\_10000\_screening\_ms\_100\_2500\_line.m  
Sample Name MY07955-Rice-S1-F03-F13  
Comment Screening01  
Waters Acquity UPLC BEH C<sub>18</sub> 1,7µm 2.1x50mm

Acquisition Date 08.08.2023 02:51:32

Operator ate06  
Instrument maXis

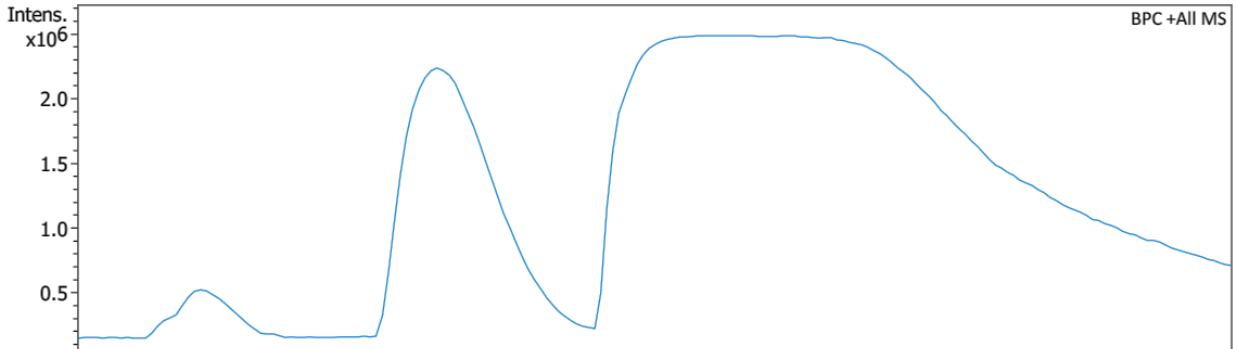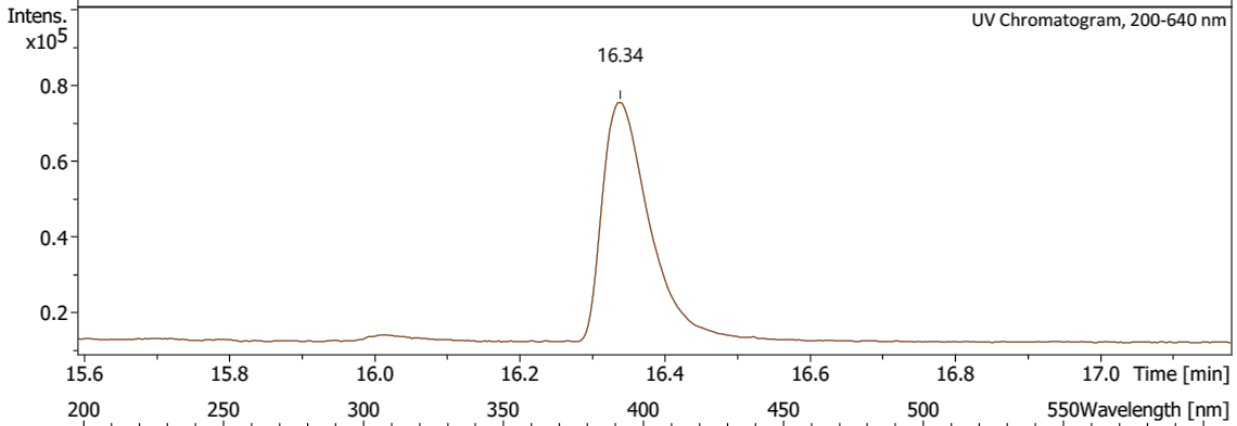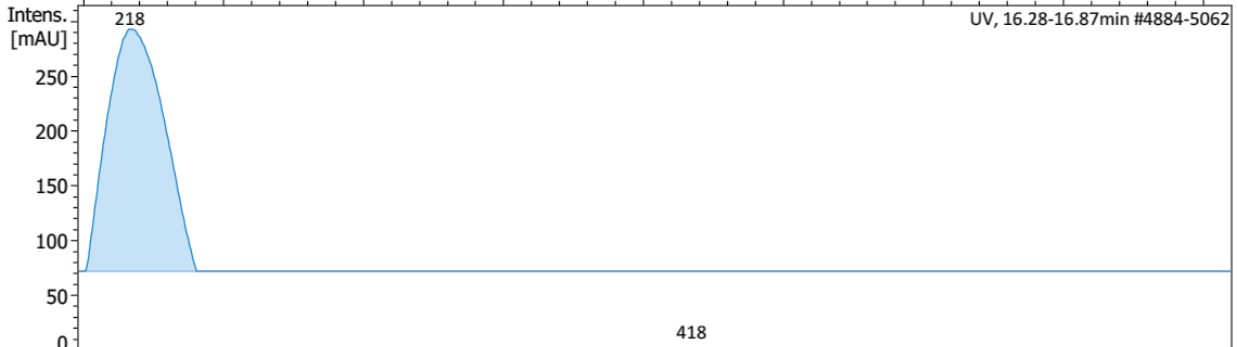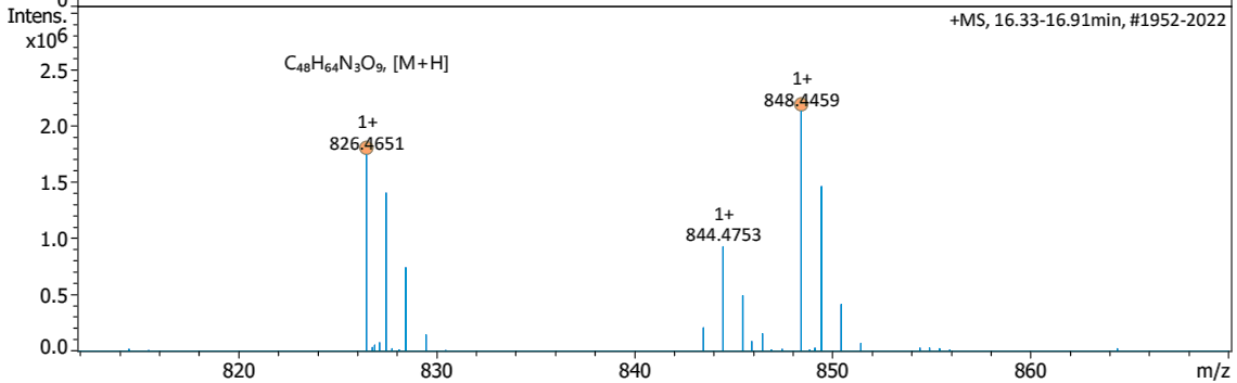

Figure S33. HRESIMS spectrum of **6**.

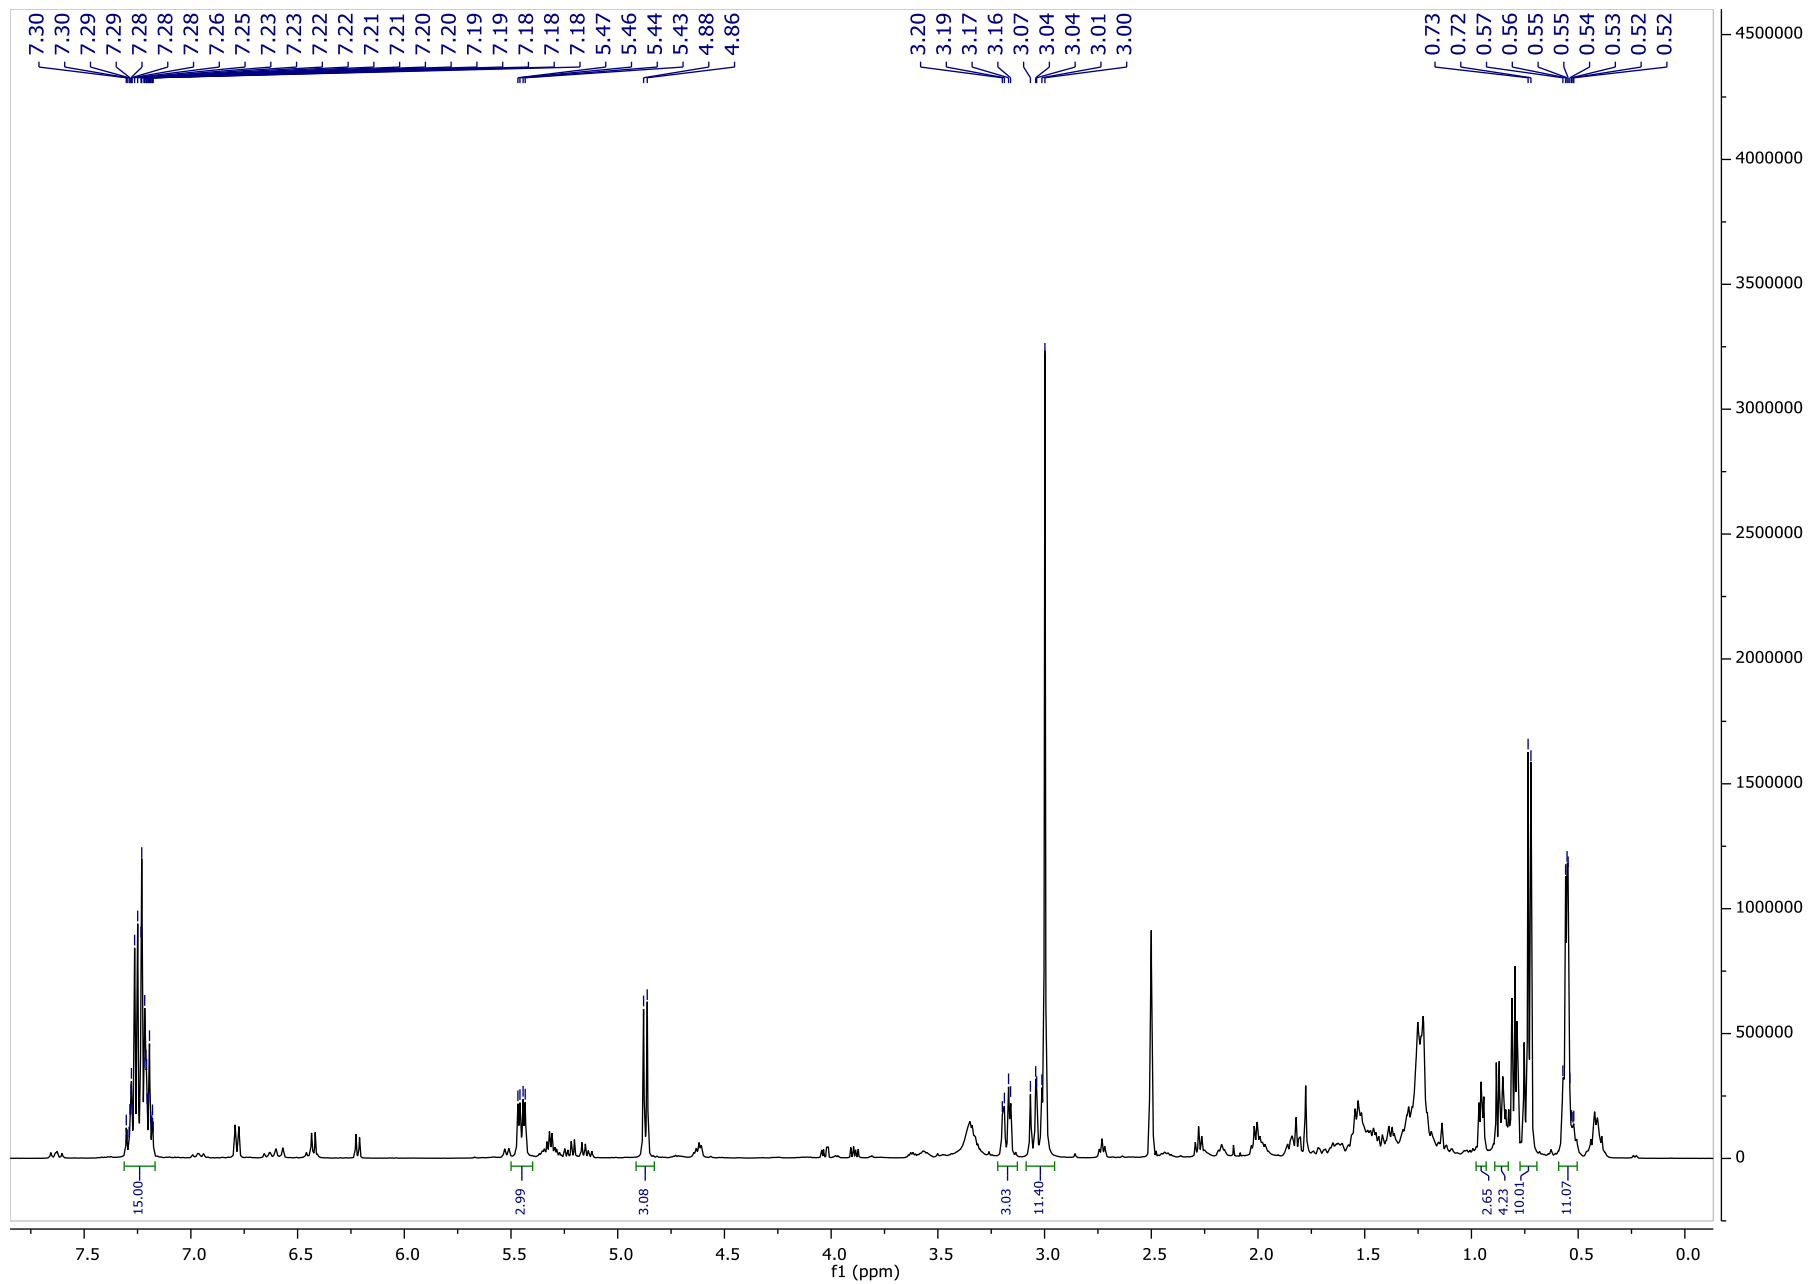

Figure S34.  $^1\text{H}$  NMR spectrum of **6** in  $\text{DMSO-}d_6$  at 500 MHz.
